# Supplementary material
Source: PubMed Central journal article supplement (PMC5834227)
Supplement: NIHMS945162-supplement-Suplemental_Material.pdf [file NIHMS945162-supplement-Suplemental_Material.pdf]

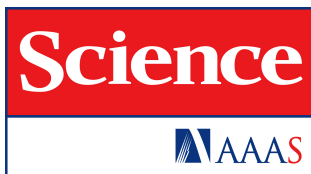

## Supplementary Materials for

### **Interacting Amino Acid Replacements Allow Poison Frogs to Evolve Epibatidine Resistance**

Rebecca D. Tarvin<sup>1,\*†</sup>, Cecilia M. Borghese<sup>2,†</sup>, Wiebke Sachs<sup>2,3,‡</sup>, Juan C. Santos<sup>4</sup>, Ying Lu<sup>1</sup>, Lauren A. O'Connell<sup>5</sup>, David C. Cannatella<sup>1,6</sup>, R. Adron Harris<sup>2</sup>, and Harold H. Zakon<sup>1</sup>.

correspondence to: [rdtarvin@gmail.com](mailto:rdtarvin@gmail.com)

#### **This PDF file includes:**

Materials and Methods  
Supplementary Text  
Fig S1 to S4  
Table S1 to S16  
Captions for databases S1 to S2

#### **Other Supplementary Materials for this manuscript includes the following:**

Databases S1 to S2 as zipped archives:  
Chrb2\_alignment.nex, Chrna4\_alignment.nex

## Materials and Methods

### Specimen Collection

Individuals were collected by JCS and LAO in Ecuador in 2013 under Ecuadorian permit No. 003-11 IC-FAU-DNB/MA to Luis A. Coloma and by RDT under Texas Parks and Wildlife Department Permit No. SPR-1097-912 to Travis Laduc (see supplementary table S1 for collection sites and species). Animals were euthanized with benzocaine (Orajel® dental gel) under ethically approved protocols (Harvard University IACUC # 12-10, UT Austin IACUC # 2012-00032); tissue samples of brain and muscle were removed and stored in RNAlater® (Life Technologies, Carlsbad, CA) at  $-20^{\circ}\text{C}$ .

### RNA Library Preparation, Transcriptome and nAChR Gene Assembly

Trizol (Life Technologies, Carlsbad, CA) was used to extract total RNA; rRNA was removed with the Poly(A) Purist kit (Life Technologies, Carlsbad, CA). Libraries of mRNA with RNA integrity numbers (RIN)  $\geq 8.0$  were prepared with the NEXTflex directional RNA-Seq dUTP-based kit (Bioo Scientific, Austin, TX). Following barcoding of cDNA libraries, 10-18 cycles of PCR were used to enrich cDNA. The resulting cDNA libraries were quantified and qualitatively analyzed with Bioanalyzer 2500 (Agilent Technologies, CA) and purified using AMPure XP beads (Beckman Coulter, Inc) to a total mean size of 300 bp. Libraries were sequenced with 100 bp paired-end sequencing on the Illumina HiSeq 2100 platform at the UT Austin Genomic Sequencing and Analysis Facility.

Raw sequences were evaluated using FastQC v 0.10.1 (37); low-quality reads were removed or trimmed using SnoWhite v 2.0.3 (38, 39) with default parameters except: -Q 20, -D T, -L T, -Y T, -a B, -t B, -b 6, -I 20. A custom script was used to verify that sequence reads were present in both paired-end files. These reads were then assembled into de novo transcriptomes with Trinity v2013-02-25, using default Trinity parameters for strand specific paired data (--SS\_lib\_type RF) (40, 41). Assemblies were run on large memory nodes of the Lonestar cluster at the Texas Advanced Computing Center (TACC). BLASTX (42) was used to compare the transcriptomes to the Universal Protein Resource (UniProt) database (43).

We used transcripts that matched Chrnb2 and Chrna4 genes with an *E* value cutoff of  $10^{-5}$  to reconstruct more complete gene sequences for the other frog transcriptomes using MITO\_bim (44). This program iteratively baits and assembles cleaned Illumina reads on a reference sequence. We used default parameters for MITO\_bim as well as the additional options '--clean' and '--quick'. When paired end reads were available, we interleaved them and used the '--paired' option. For reads that were longer than 75 bp, we used a longer kmer ('-kbait 45'); otherwise we used the default -kbait of 31 bp. Outgroup sequences were obtained directly from Genbank or were reconstructed from SRA entries as described above. Specimen information can be found in table S1.

### AA Replacement Identification

We aligned gene assemblies using the linsi algorithm in MAFFT v7.023b (45) and adjusted the alignment to match the start and end codon of *Homo sapiens* CHRNB2 and CHRNA4 proteins (NCBI accession numbers NM\_000748.2 and NM\_000744.6, respectively). To place our sequences in an evolutionary context, we compared sequences across dendrobatid frogs, non-dendrobatid frogs, and several non-frog outgroups using

the reference phylogeny as described in (15) (see table S4 for GenBank accession numbers). We reviewed the alignment site by site to identify residues that were highly conserved in non-dendrobatid frogs and other vertebrates, but showed patterns of AA replacements that were associated with epibatidine chemical defense in dendrobatids, which is known only from species of the *Epipedobates* and *Ameerega* clades. We identified four sites in Chrnb2 and one site in Chrna4 that were caused by a mutation in the first or second codon position and appeared to be associated with epibatidine defense.

To improve our phylogenetic sampling, we designed primers from the reconstructed genes and sequenced the identified region in Chrnb2 from additional samples from the Genetic Diversity Collection of UT Biodiversity Collections (see supplementary table S1 for species and museum numbers) and recent tissue collections (under permit IBD0359 - Res 1177-2014 [Colombia]) Primers that were used are: chrnb2-Cfug-413F (5'-AAGTGCCTCTCCCATCCAAG-3') and chrnb2-Cfug-814R (5'-TGTAGAACAGAGGCTTGCGG-3'). PCR parameters were: 4-min initial denaturation at 93°C, 40 cycles of 30 s at 93°C, 30 s at 60°C, 45 s at 72°C, and a final extension time of 7 min at 72°C. PCR products were sequenced using forward and reverse primers at the UT Austin Institute for Cellular and Molecular Biology Core Facility on an Applied Biosystems 3730 DNA Sequencer. The sequences reported are only reverse reads because the forward primer was located on the edge of a long intron that varied in length and did not produce readable sequences.

### In Vitro Transcription

cDNAs encoding human nAChR subunits were cloned in pSP64 (constructs generously shared by Dr. J. M. Lindstrom). cDNAs encoding *Epipedobates* nAChR subunits were synthesized, optimized for expression in *Xenopus laevis* and subcloned in pGEMHE by GenScript (Piscataway, NJ). After linearizing the plasmids, the *in vitro* transcription of nAChR subunits was performed using mMessage mMachine (Life Technologies, Grand Island, NY).

### Oocyte Isolation and Injection

*Xenopus laevis* frogs were obtained from Nasco (Fort Atkinson, WI) and cared for according to the recommendations of the NIH Guide for the Care and Use of Laboratory Animals. All surgery was performed in accordance with protocols approved by the University of Texas, Austin IACUC (AUP-2015-00205 and AUP-2016-00016). Part of *X. laevis* ovaries were surgically removed from a frog and placed in Isolation media (108 mM NaCl; 2 mM KCl; 1 mM EDTA; 10 mM HEPES; pH = 7.5). The oocytes were then manually isolated and treated with 0.5 mg/ml collagenase for 10 min. Thereafter, cRNA encoding the nAChR subunits (for human subunits: 10 ng total cRNA,  $\alpha$ 4: $\beta$ 2 in 1:3 or 3:1 W/W ratios; for *Epipedobates* subunits: 32 or 40 ng total cRNA,  $\alpha$ 4: $\beta$ 2 in 1:7 or 7:1 W/W ratios) was injected with the Nanoject II (Drummond Scientific Company, Broomall, PA) into the cytoplasm of the oocytes. The injected oocytes were kept at 16°C in incubation media (composition: 50 % Leibovitz L-15 medium; 10 mM HEPES; 10 U/ml penicillin; 10  $\mu$ g/ml streptomycin; pH = 7.4).

### Chemicals

All chemicals and solvents were of analytical grade and were purchased from Sigma-Aldrich (St. Louis, MO), Mallinckrodt Chemicals (St. Louis, MO), Amresco (Solon, OH) and Life Technologies (Grand Island, NY). Epibatidine was purchased from Tocris Bioscience (Bio-Techne, Minneapolis, MN).

### Electrophysiological Recordings

Responses to ACh and epibatidine were studied 1-10 days after injection through two-electrode voltage-clamp (Oocyte Clamp OC-725C, Warner Instruments, Hamden, CT), and digitized using a PowerLab 4/30 system (ADInstruments, Colorado Springs, CO). The oocytes were placed in a rectangular chamber and continuously perfused with Ba-ND96 + Atropine buffer (2 ml/min; 96 mM NaCl, 2 mM KCl, 1 mM BaCl<sub>2</sub>, 1 mM MgCl<sub>2</sub>, 10 mM HEPES, 1 μM atropine) at room temperature. Oocytes were clamped at -70 mV using two glass electrodes filled with 3 M KCl. All drugs were applied by bath-perfusion, and solutions were prepared the day of the application.

Concentration-response curves (CRCs) for acetylcholine (ACh) and epibatidine were obtained by applying increasing concentrations (20-30 s applications for ACh, 30-120 s for epibatidine) with 5-20 min washout times. All responses were normalized to the maximal ACh response seen in that oocyte by assigning it a 100% value. Oocytes with currents larger than 20 μA were discarded.

### Statistical Analysis

Results were expressed as mean ± SEM. All statistical analysis was performed with Prism 7 (GraphPad Software Inc., San Diego, CA). The results from the CRCs were fitted to monophasic (Eq. 1) or biphasic (Eq. 2) logistic equations, and all parameters (log EC<sub>50</sub>, Hill coefficients, maximal currents) were determined. The best fitted equation was determined by applying the Extra sum-of-squares F test. All relevant CRC results and parameters are shown in tables S5–S8.

$$I = \frac{\text{Maximal current}}{1 + 10^{(\log EC_{50} - \log[\text{agonist}]) \times n_H}} \quad \text{Eq. 1}$$

$$I = \frac{\text{Maximal current}_A}{1 + 10^{(\log EC_{50A} - \log[\text{agonist}]) \times n_{HA}}} + \frac{\text{Maximal current}_B}{1 + 10^{(\log EC_{50B} - \log[\text{agonist}]) \times n_{HB}}} \quad \text{Eq. 2}$$

*I*, measured current; *Maximal current* achieved, expressed as a percentage of the maximal ACh response recorded in that oocyte; *EC*<sub>50</sub>, effective concentration 50, or concentration that produces half the maximal current; *n*<sub>H</sub>, Hill coefficient. Subscripts A and B indicate correspondence to two different populations of responses.

Two-way analysis of variance (ANOVA) corrected for multiple comparisons with Sidak's test was used to compare *logEC*<sub>50</sub> and *Maximal Currents* within each group of results whenever possible (Human-to-*Epipedobates*, tables S9-S10; Human-to-*Ameerega*, tables S11-S12; *Epipedobates*-to-Human, tables S13-S15). The ACh responses from nAChRs containing either human (*H*) or *Epipedobates* (*E*) subunits or their combination in an α4:β2 cRNA ratio of 7:1 were best-fitted by mono- or biphasic curves. The high sensitivity component of the biphasic curves is associated with a very high error, because it comprises a smaller proportion of the receptors and the slope of the curve is small.

Therefore, only the  $\log EC_{50}$  values from the monophasic and the low sensitivity portion (b) of the biphasic curves were considered in the one-way ANOVA (table S16).

## Supplementary Text

### Double Mutants in Human-to-*Ameerega* High-Sensitivity nAChRs

In these experiments we aimed to verify the effects of mutation combinations, which are not always predictable. While usually the result is the sum of individual effects, in some cases one mutation dominates over the other, and in a small percentage of cases, the interaction causes completely unpredictable outcomes.

For example, the FCAV genotype did not seem to modify the ACh sensitivity compared with the FSAI genotype (fig. S3A), even though it includes the S108C and the I118V replacements, which by themselves (FCAI and FSAV genotypes) induce the appearance of a biphasic curve (suggesting the presence of a LS binding site) (fig 2C). In the other two double mutants FCVI and FSVV, sensitivity to ACh appeared to decrease, similar to the effect of the individual single mutants (FCAI and FSAV) (fig. S3A, tables S6 and S9).

There were also interactions among the effects on epibatidine resistance of three AA replacements in *Ameerega* (fig. S3B and table S6). In all three double mutants, sensitivity to epibatidine decreased, likely conferred by either the S108C and/or the I118V replacement, which both individually increase the epibatidine  $EC_{50}$  values (table S11). However, the normalized maximal epibatidine response was increased in the FSVV genotype compared with the FSAI genotype, while none of the single mutants showed an increased normalized maximal epibatidine response (table S12). Therefore, in some cases, the combination of the AA in the same subunit affected the epibatidine action on nAChR function in ways unpredicted by the single AA replacements.

### Low-ACh-sensitivity nAChR

When the ratio of injected  $\alpha 4:\beta 2$  cRNA was reversed to 3:1, which should favor the formation of the LS stoichiometry  $(\alpha 4)_3(\beta 2)_2$ , the ACh sensitivity decreased as expected. In these cases, the best fit for the ACh currents was usually a biphasic curve consisting of high- and low-sensitivity populations (HS and LS, respectively). The appearance of a second population is due to the presence of a non-canonical binding site at the  $\alpha^+ - \alpha^-$  interface (46, 47), which denotes the LS  $(\alpha 4)_3(\beta 2)_2$  receptors. For some currents, it was not possible to fully discriminate the two populations, observing instead a “flat” (low Hill coefficient) single population curve.

Results from electrophysiology of the LS nAChR were not as clear as those from the HS receptors. It is possible that there were HS receptors present, even though the ratio favors the formation of LS receptors, and this complicates the evaluation. Human-to-frog genotypes (FCAI, LCAI and FCVV) showed decreased sensitivity to ACh compared to wild-type human receptors (FSAI) (fig. S2A and 2C), mainly because they lacked the HS component (i.e., the left part of the biphasic curve). Overall, both stoichiometries of the human-to-frog nAChRs showed lower sensitivity to epibatidine compared to that of the human genotype (FSAI) (fig. S2B and 2D and table S9). Similar to the HS nAChRs, the change in sensitivity to epibatidine in the LS nAChR was driven by the S108C mutation (FCAI genotype), which was present in all three frog clades, in addition to the I118V

replacement, which was present only in *Ameerega* (fig. S2B and 2D and table S9). The other mutations (F106L in *Epipedobates* and A110V in *Ameerega*) appeared to correct (at least partially) the decrease in ACh sensitivity induced by the epibatidine-insensitive replacements. As previously reported (26), we observed that epibatidine is a super-agonist in the low sensitivity nAChRs, i.e., it elicits maximal currents larger than those induced by a maximal concentration of ACh, the endogenous ligand (see human  $\alpha 4\beta 2$  nAChR FSAI genotype, Fig. S2B). While the epibatidine super-agonist activity is present in the 3:1 FCAI receptors, it did not reach the levels of the other genotypes in the group, likely because the presence of the Cys interferes with the epibatidine binding.

#### Unexpected Formation of LS Stoichiometry in Mutant Human nAChR

In the human-to-frog FCAI genotype receptors that formed following the injection ratio of  $1\alpha:3\beta$ , which should favor the HS stoichiometry, a low sensitivity ACh component appears unexpectedly, producing a biphasic curve (Fig. 2A). There are three hypotheses that could explain this. 1) There is a  $\beta^+-\beta^-$  interface in HS  $(\alpha 4)_2(\beta 2)_3$  receptors which the S108C mutation modifies in such a way that it now binds ACh at a lower sensitivity, similar to the low sensitivity binding site at the  $\alpha^+-\alpha^-$  interface of LS  $(\alpha 4)_3(\beta 2)_2$  receptors. As all the AAs required for the ACh binding site in the primary (+) side of the interface are present in the  $\beta 2$  subunit, this would require only a change in the complementary (-) side, where C108 is located. 2) The two  $\alpha^+-\beta^-$  binding sites are not functionally equivalent, as the  $\beta 2$  subunits are flanked one by an  $\alpha 4$  and the other by a  $\beta 2$  subunit (48). Replacing S108 with Cys could enhance those differences until one binding site has a much lower ACh sensitivity than the other, producing biphasic CRCs. 3) S108, along with the other three AA replacements, is located in a region homologous to the one critical for surface expression of muscle nAChRs (49). Other mutations have been shown to modify the stoichiometry of the nAChR (50, 51), so the substitution of S108 by Cys could affect the assembly/trafficking of the nAChR, enabling the formation of LS  $(\alpha 4)_3(\beta 2)_2$  receptors even though the cRNA ratio favors the other stoichiometry.

In support of the third hypothesis, the epibatidine CRCs are basically identical for the 1:3 and 3:1 FCAI genotype in human receptors (parameters in Table S5, statistics in Table S9 and S10), suggesting that both 1:3 and 3:1 FCAI genotypes assemble in the LS stoichiometry. Moreover, the ACh CRC of the 1:3 and 3:1 FCAI nAChR are remarkably similar (table S5). In contrast, epibatidine and ACh CRCs of genotypes not containing the Cys (FSAI and LSAI) differ between 1:3 and 3:1 ratios in ACh  $EC_{50}$ , epibatidine  $EC_{50}$  and normalized maximal current (tables S5, S9 and S10), suggesting that they are capable of forming HS and LS stoichiometry.

#### Epipedobates-to-Human and Human-frog Combination Receptors

Our results suggest that the *Epipedobates* nAChR may not be able to form the LS  $(\alpha 4)_3(\beta 2)_2$  receptors, at least when expressed in *Xenopus* oocytes. As previously mentioned, this stoichiometry normally possesses a lower ACh sensitivity binding site due to the  $\alpha^+-\alpha^-$  interface in  $(\alpha 4)_3(\beta 2)_2$ . Even when we increased the  $\alpha:\beta$  cRNA ratio to 7:1, the ACh CRCs were indistinguishable from the 1:7 counterparts (tables S7 and S13). In contrast to the human nAChRs, the ACh responses of 7:1 *Epipedobates* receptors showed monophasic HS CRCs (Fig. S2G, table S7), not the right shifted or biphasic ACh CRCs that are characteristic of the  $(\alpha 4)_3(\beta 2)_2$  nAChR stoichiometry (Fig. S2A and S2C,

table S5). The sensitivity to ACh was the same for all 7:1 *Epipedobates* nAChRs; the only difference arose between LCAI and FCAI genotypes, where FCAI was less sensitive than LCAI (tables S7 and S13). The epibatidine CRCs presented a pattern of changes similar to the one observed for the high-sensitivity nAChRs (Fig 2H versus fig. S2H; tables S7 and S14), where FSAI and LSAI genotypes showed high sensitivity to epibatidine, while LCAI and FCAI exhibited low sensitivity to the toxin. All epibatidine  $EC_{50}$  values were slightly increased in the 7:1 compared to the 1:7 receptors (tables S7 and S14), but the increase was nowhere near the changes observed between the 1:3 and 3:1 human receptors.

To further investigate the possibility that *Epipedobates* nAChR do not form the LS  $(\alpha 4)_3(\beta 2)_2$  stoichiometry, we injected combinations of human and *Epipedobates* subunits in the 7:1  $\alpha$ : $\beta$  ratio (fig. S4, tables S8 and S16). When the human  $\alpha 4$  subunit was expressed with the human  $\beta 2$ , the usual two-population CRC was observed, corresponding to the LS  $(\alpha 4)_3(\beta 2)_2$  stoichiometry; when it was co-injected with the *Epipedobates*  $\beta 2$  (LCAI) subunit, the result was a CRC intermediate between the *Epipedobates* and the human nAChRs, with a low Hill coefficient, where both stoichiometries appeared to be present but the currents could not be resolved in two populations. Therefore, when *Epipedobates*  $\beta 2$ (LCAI) subunits were co-expressed with human  $\alpha 4$ , they were capable of forming the LS  $(\alpha 4)_3(\beta 2)_2$  stoichiometry, although not as efficiently as the human  $\beta 2$ (FSAI). In contrast, every subunit combination containing the *Epipedobates*  $\alpha 4$  subunit produced only HS nAChRs, suggesting that any receptor with this subunit was only capable of forming the HS  $(\alpha 4)_2(\beta 2)_3$  stoichiometry. Thus, the main determinant for the formation of the LS  $(\alpha 4)_3(\beta 2)_2$  stoichiometry in these frogs is the  $\alpha 4$  subunit.

Alignment of the  $\alpha 4$  sequences (table S3) showed an AA that differs between *Epipedobates* (N176) and all other dendrobatid species sequenced (where that AA is D). This AA is proximal to the epibatidine binding site at the  $\alpha 4$ - $\alpha 4$  interface, but not in direct contact with epibatidine (see fig. S1 for localization of the AA in the complementary side of the interface). We tested the corresponding mutants to determine if this AA was sufficient [*Epipedobates*  $\alpha 4$ (N176D) replacement,  $\alpha 4$ (D) genotype] or necessary [human  $\alpha 4$ (D176N) replacement,  $\alpha 4$ (N) genotype] to allow the formation of LS receptors when co-expressed with the corresponding wild-type  $\beta 2$ . None of these manipulations modified the CRCs compared with the respective wild-types. Therefore, the inability to form the LS nAChR likely depends on additional mutations present in the  $\alpha 4$  subunit, and, to a lesser degree, on others present in the  $\beta 2$  subunit besides the ones studied here. As the number of AAs different in *Epipedobates*  $\alpha 4$  from the human receptors proximal to the  $\alpha$ - $\alpha$  interface is quite high, we were unable to determine the identity of the AA responsible for this characteristic (see table S3). The  $\alpha 4$  AA replacement in *Epipedobates* ( $\alpha 4$ N176) is located at the complementary side of the interface, and it could only be proximal to the epibatidine binding site in LS  $(\alpha 4)_3(\beta 2)_2$  receptors. As the *Epipedobates*  $\alpha 4$  subunits only form HS nAChRs, no matter the  $\beta 2$  subunit co-expressed, we did not study the epibatidine actions on the  $\alpha 4$ (N176D)-containing receptors.

As the AAs present in  $\beta 2$  that drive the formation of HS nAChRs seem to be less critical than those in  $\alpha 4$ , we wondered whether the FCAI genotype would be able to form LS nAChRs when co-expressed with human  $\alpha 4$ . In the human nAChRs, the  $\beta 2$ (FCAI)

genotype induced a biphasic ACh CRC, even when injected in the 1:3 ratio, which favors formation of the HS nAChR. When human  $\alpha 4$  subunits were co-expressed with *Epipedobates*  $\beta 2$ (FCAI) subunits, the resulting ACh CRC was biphasic like the human  $\alpha 4\beta 2$ (FSAI), in contrast to the monophasic, “flat” curve obtained with human  $\alpha 4$  *Epipedobates*  $\beta 2$ (LCAI). Therefore, the *Epipedobates*  $\beta 2$ (LCAI) subunit is clearly capable of forming LS ( $\alpha 4$ )<sub>3</sub>( $\beta 2$ )<sub>2</sub> receptors when partnered with some unknown, critical AA present in the human  $\alpha 4$  subunit, and that capability is greatly improved with the  $\beta 2$ (FCAI) genotype. However, the FCAI genotype carries a cost in the poison frog HS ( $\alpha 4$ )<sub>2</sub>( $\beta 2$ )<sub>3</sub> receptors (2-fold decrease in ACh sensitivity, Table 1), and therefore may require compensatory mutations to balance this trade off. We were able to identify at least some of these additional replacements in *Epipedobates* and *Ameerega*. *Oophaga* may possess other unidentified mechanisms or mutations that allow the FCAI genotype to survive.

#### ACh Sensitivity In Human-To-*Epipedobates* Mutants: High-Sensitivity Versus Low-Sensitivity nAChRs

The AA replacements in the human LCAI HS nAChR were able to perfectly maintain ACh sensitivity while decreasing epibatidine sensitivity (Fig. 2E and F). However, this pattern was slightly modified for human LS nAChRs, because even though the epibatidine sensitivity was greatly decreased, sensitivity to ACh also decreased, as the high-sensitivity component of the ACh curve was missing in these receptors, possibly because the S108C replacement altered the receptor stoichiometry (see above) (fig. S2A and S2B). The potential problem of decreased ACh sensitivity in LS receptors seems to have been solved in *Epipedobates* because they do not appear to form the LS nAChRs, at least in *Xenopus* oocytes. Thus, we speculate that the inability to form LS nAChRs could be an adaptation of *Epipedobates* as part of an imperfect solution to the cost of acetylcholine sensitivity incurred by the AA replacements that provide resistance.

Interestingly, all *Epipedobates*  $\alpha 4\beta 2$  nAChR (LCAI, FSAI, LSAI, and FCAI genotypes) were slightly more sensitive to ACh than human  $\alpha 4\beta 2$  nAChR (FSAI genotype), suggesting a slight but fundamental difference between mammalian and anuran nAChRs.



**Fig. S1.**

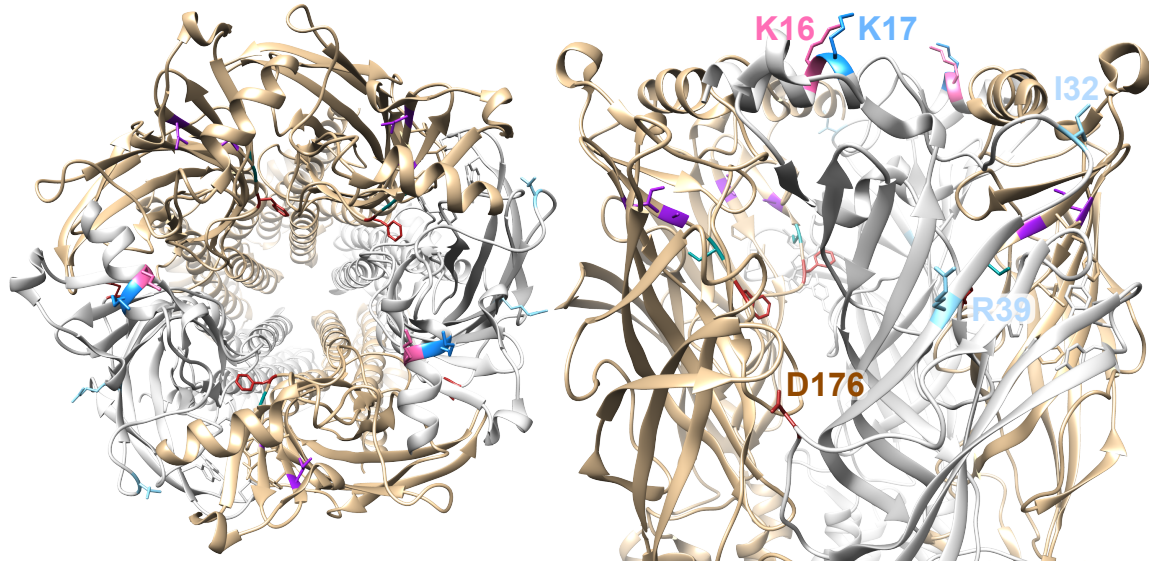

**Fig. S1. AA replacements in  $\alpha 4$  subunit of nicotinic acetylcholine receptor.**

AA residues are labeled where AA replacements occur in *Epipedobates* (D176, brown), *Ameerega* (I32 and R39, light blue), *Oophaga* (K16, pink), both *Ameerega* and *Oophaga* (K17, blue). Alpha4 subunits are in gray and  $\beta 2$  subunits in gold.

Fig. S2.

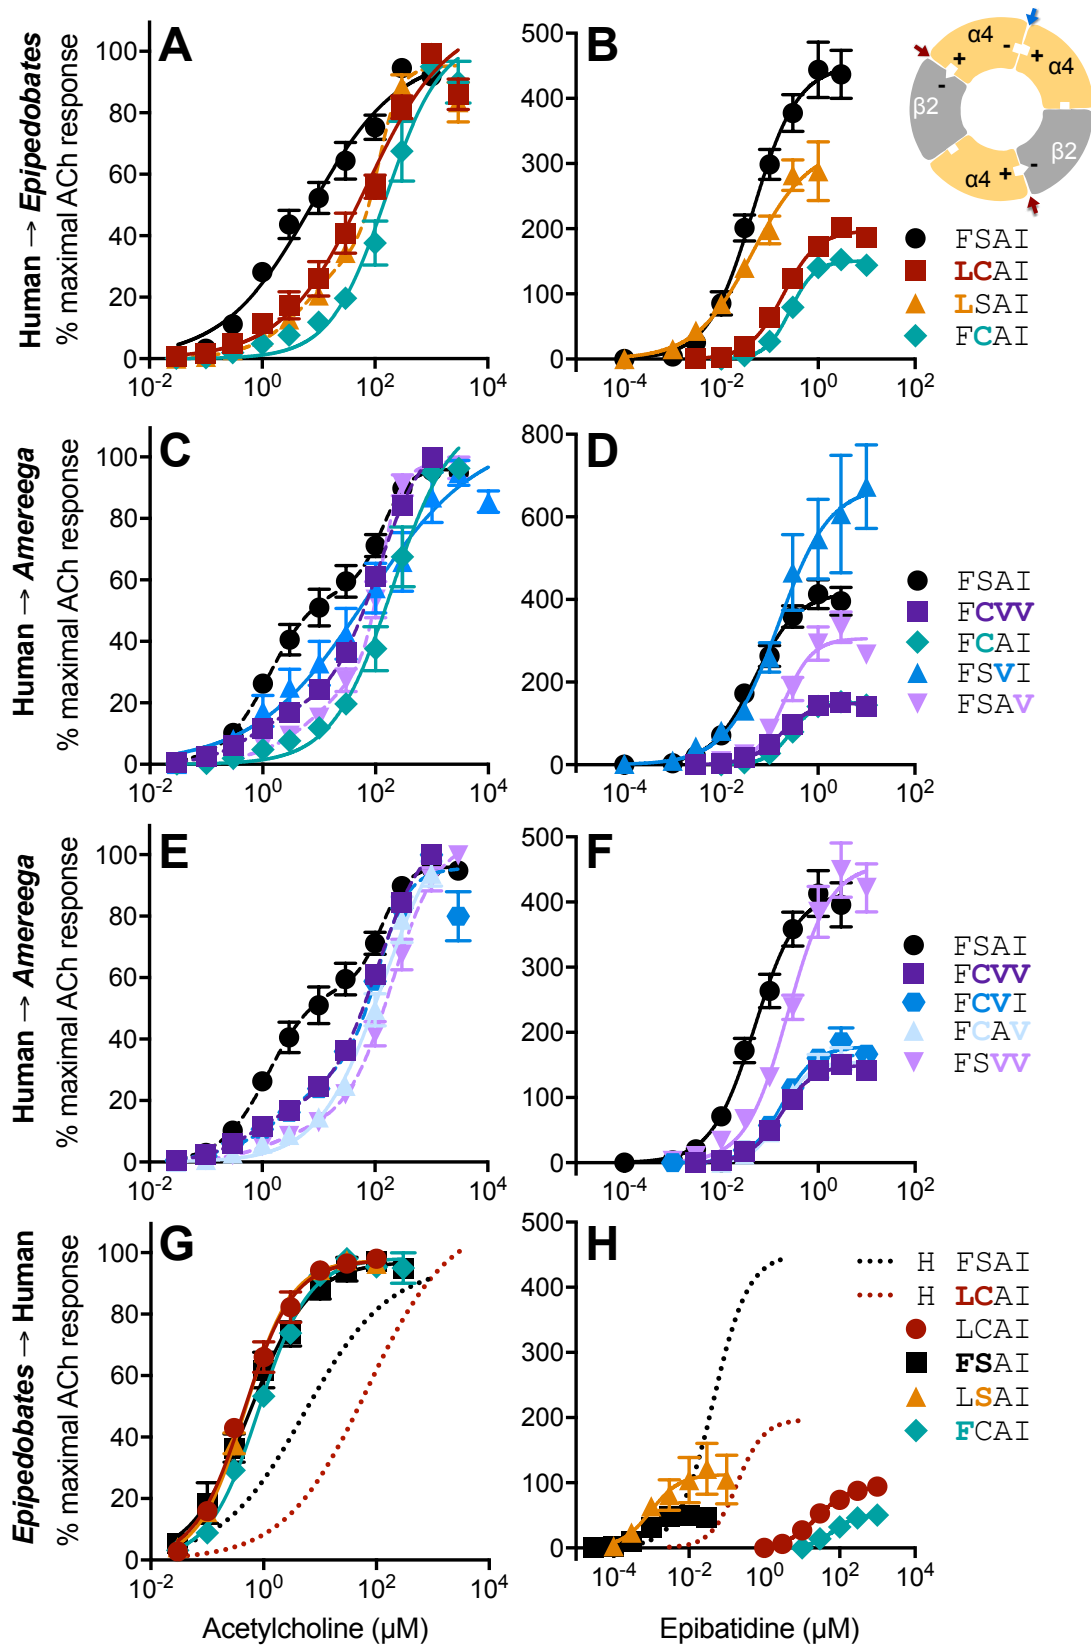

**Fig. S2. ACh and epibatidine concentration-response curves in low-sensitivity  $\alpha 4\beta 2$  nAChR.**

Left panels show responses to ACh and right panels show responses to epibatidine in nAChRs expressed in *Xenopus laevis* oocytes, recorded using two-electrode voltage clamp. (A, B) Human wild-type  $\alpha 4\beta 2$  nAChRs (FSAI genotype) and receptors containing the AA patterns identified in *Epipedobates* poison frogs (LCAI, LSAI and FCAI genotypes). (C, D) Human wild-type  $\alpha 4\beta 2$  nAChRs (FSAI genotype) and receptors containing the AA replacements identified in *Ameerega* (FCVV) along with the single mutants (FCAI, FSVI, FSAV). (E, F) Human wild-type  $\alpha 4\beta 2$  nAChRs (FSAI genotype) and receptors containing the AA replacements identified in *Ameerega* (FCVV) along with the double mutants (FCVI, FCAV, FSVV). (G, H) *Epipedobates* wild-type  $\alpha 4\beta 2$  nAChRs (LCAI genotype) and receptors containing the AA replacements identified in human (FSAI) along with the single mutants (FCAI, LSAI). Dotted lines (···) in panels G and H correspond to human FSAI and LCAI curves from A and B panels. Error bars not visible are smaller than the symbols. Data was fitted to either mono- (–) or biphasic (–) curves. Inset: schematic of LS  $\alpha 4\beta 2$  nAChR stoichiometry; ligand-binding sites indicated by red (high-sensitivity) and blue (low-sensitivity) arrows.

Fig. S3

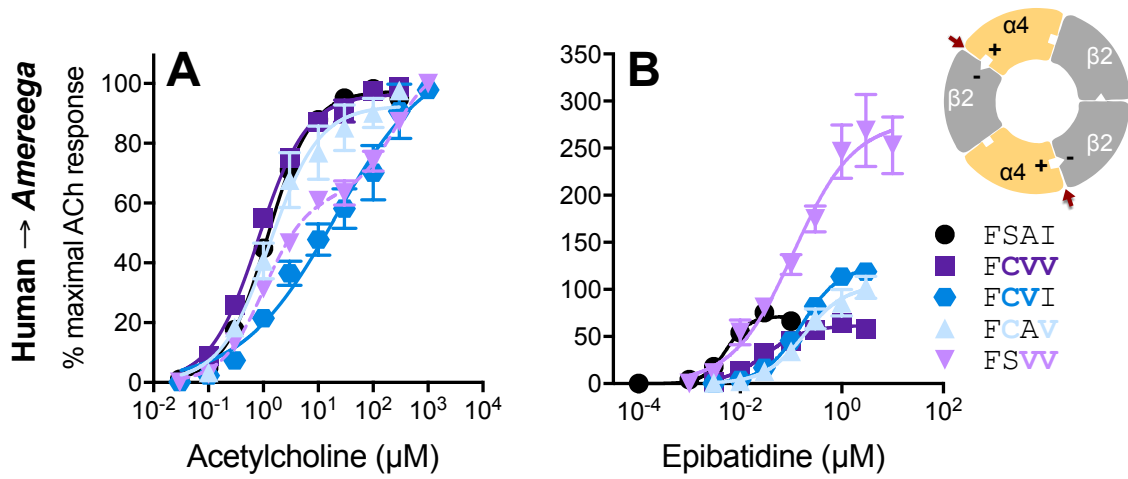

**Fig. S3. ACh and epibatidine concentration-response curves in high-sensitivity  $\alpha 4\beta 2$  nAChR in human wild-type and double mutants.**

Human wild-type  $\alpha 4\beta 2$  nAChRs (FSAI genotype) and receptors containing the AA replacements identified in *Ameerega* (FCVV) along with the double mutants (FCVI, FCAV, FSVV): responses to (A) ACh and (B) epibatidine. Inset: schematic of HS  $\alpha 4\beta 2$  nAChR subunit stoichiometry, with ligand binding sites indicated by arrows.

Fig. S4

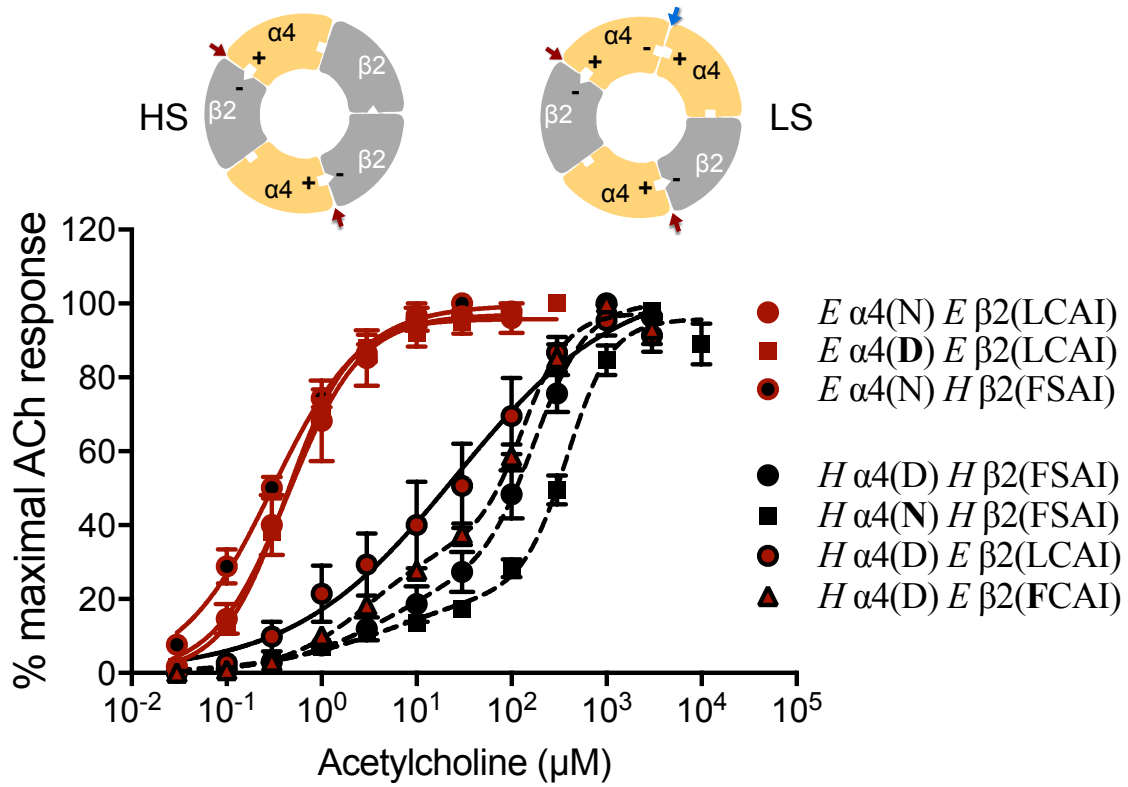

**Fig. S4. ACh concentration-response curves (CRCs) in  $\alpha 4\beta 2$  nAChR composed of human subunits, *Epipedobates* subunits, and mixtures of the two ( $\alpha : \beta$  ratio 7:1).**

Human (*H*) wild-type  $\alpha 4\beta 2$  nAChRs [ $\alpha 4(\text{D})$  and  $\beta 2(\text{FSAI})$  genotypes], *Epipedobates* (*E*) wild-type  $\alpha 4\beta 2$  nAChRs [ $\alpha 4(\text{N})$  and  $\beta 2(\text{LCAI})$  genotypes], and combinations incorporating the mirror AA replacement patterns in  $\alpha 4$  (**D** and **N**), as well as the *Epipedobates*  $\beta 2(\text{FCAI})$  genotype. Inset: schematic of  $\alpha 4\beta 2$  nAChR subunit stoichiometries, with ligand binding sites indicated by arrows.

**Table S1. Specimen information.**

Collection sites for sequenced individuals. TNHC-FS, Texas Natural History Collections Field Series; QCAZ, El Museo de Zoología de la Pontificia Universidad Católica del Ecuador; JCS, Juan Carlos Santos.

| Genus                                        | Species                | Coordinates               | Locality         | Country   | Museum Number (Field Series) / Sequence Read Archive | GenBank Accession No. (Chrn2) | GenBank Accession No. (Chrna4) |
|----------------------------------------------|------------------------|---------------------------|------------------|-----------|------------------------------------------------------|-------------------------------|--------------------------------|
| <b>Dendrobatid anurans</b>                   |                        |                           |                  |           |                                                      |                               |                                |
| <i>Allobates</i>                             | <i>femorialis</i>      | 0.040912N,<br>-77.316382W | Lumbaquí         | Ecuador   | (JCS 2008)                                           | MF580104                      | --                             |
| <i>Allobates</i>                             | <i>kingsburyi</i>      | -2.81195S,<br>-78.35395W  | Plan Grande      | Ecuador   | (JCS 2008)                                           | MF580102                      | --                             |
| <i>Allobates</i>                             | <i>talamancae</i>      | 1.175948N,<br>-78.72983W  | Tundaloma        | Ecuador   | (JCS 2008)                                           | MF580089                      | MF580119                       |
| <i>Allobates</i>                             | <i>zaparo</i>          | -1.91961S,<br>-77.82273W  | Río Pastaza      | Ecuador   | (JCS 2008)                                           | MF580103                      | MF580111                       |
| <i>Ameerega</i>                              | <i>bilinguis</i>       | -1.06214S,<br>-77.600568W | Ahuano           | Ecuador   | (JCS 2008)                                           | MF580088                      | --                             |
| <i>Ameerega</i>                              | <i>hahneli</i>         | -1.59298S,<br>-77.80866W  | Canelos          | Ecuador   | (JCS 2008)                                           | MF580085                      | MF580121                       |
| <i>Ameerega</i>                              | <i>parvula</i>         | -2.81195S,<br>-78.35395W  | Gualaquiza       | Ecuador   | (JCS 2008)                                           | MF580087                      | MF580118                       |
| <i>Ameerega</i>                              | <i>trivittata</i>      |                           | Leticia          | Colombia  | (RDT0163)                                            | MF580086                      | --                             |
| <i>Colostethus</i>                           | <i>fugax</i>           | -1.59298S,<br>-77.80866W  | Canelos          | Ecuador   | (JCS 2008)                                           | MF580095                      | MF580120                       |
| <i>Dendrobates</i><br>( <i>Andinobates</i> ) | <i>fulguritus</i>      | 5.611517N,<br>-77.418186W | Termales         | Colombia  | ANDES-A2436<br>(RDT0128)                             | MF598759                      | --                             |
| <i>Dendrobates</i><br>( <i>Excidobates</i> ) | <i>captivus</i>        | -3.78255S,<br>-78.74771W  | Zumbi            | Ecuador   | (JCS 2008)                                           | MF580096                      | --                             |
| <i>Dendrobates</i><br>( <i>Oophaga</i> )     | <i>pumilio</i>         | NA                        | Isla de Diamante | Nicaragua | LSUMZH-15103 (OMNH-33297)                            | MF598757                      | --                             |
| <i>Dendrobates</i><br>( <i>Oophaga</i> )     | <i>sylvaticus</i>      | -0.268356S,<br>-79.12051W | Villa Hermosa    | Ecuador   | QCAZA58255 (RDT0035)                                 | MF580098                      | MF598760                       |
| <i>Dendrobates</i><br>( <i>Ranitomeya</i> )  | <i>ventrimaculatus</i> | NA                        | Leticia          | Colombia  | (RDT0164)                                            | MF580107                      | --                             |

| <b>Table S1 cont.</b>            |                       |                                     |                 |                |                                                             |                                      |                                       |
|----------------------------------|-----------------------|-------------------------------------|-----------------|----------------|-------------------------------------------------------------|--------------------------------------|---------------------------------------|
| <b>Genus</b>                     | <b>Species</b>        | <b>Coordinates</b>                  | <b>Locality</b> | <b>Country</b> | <b>Museum Number (Field Series) / Sequence Read Archive</b> | <b>GenBank Accession No. (Chrn2)</b> | <b>GenBank Accession No. (Chrna4)</b> |
| <b>Dendrobatid anurans cont.</b> |                       |                                     |                 |                |                                                             |                                      |                                       |
| <i>Dendrobates</i>               | <i>truncatus</i>      | 4.19277N,<br>-74.630953W            | Melgar          | Colombia       | ANDES-A2427 (RDT0119)                                       | MF580097                             | --                                    |
| <i>Epipedobates</i>              | <i>anthonyi</i>       | -3.30756S,<br>-79.77917W            | El Progreso     | Ecuador        | (JCS 2008)                                                  | MF580094                             | MF580123                              |
| <i>Epipedobates</i>              | <i>boulengeri</i>     | 0.10189N,<br>-79.13724W             | Arashá          | Ecuador        | (JCS 2008)                                                  | MF580092                             | MF580122                              |
| <i>Epipedobates</i>              | <i>darwinwallacei</i> | -0.05539S,<br>-78.78642W            | Mindo           | Ecuador        | (JCS 2008)                                                  | MF580093                             | MF580110                              |
| <i>Epipedobates</i>              | <i>machalilla</i>     | -2.57390S,<br>-79.35683W            | Manta Real      | Ecuador        | (JCS 2008)                                                  | MF580091                             | MF580112                              |
| <i>Epipedobates</i>              | <i>tricolor</i>       | -1.37881S,<br>-79.15575W            | Chazo Juan      | Ecuador        | (JCS 2008)                                                  | MF580090                             | --                                    |
| <i>Hyloxalus</i>                 | <i>italoi</i>         | -1.60595S,<br>-77.84275W            | Canelos         | Ecuador        | (JCS 2008)                                                  | MF580083                             | MF580124                              |
| <i>Hyloxalus</i>                 | <i>jacobuspetersi</i> | -0.419S,<br>-78.407W                | Molinuco        | Ecuador        | (JCS 2008)                                                  | MF598758                             | --                                    |
| <i>Hyloxalus</i>                 | <i>nexipus</i>        | -2.74573S,<br>-78.30503W            | Río Negro       | Ecuador        | (JCS 2008)                                                  | MF580101                             | MF580125                              |
| <i>Phyllobates</i>               | <i>aurotaenia</i>     | 3.985674N,<br>-77.376574W           | La Barra        | Colombia       | ANDES-A2456 (RDT0148)                                       | MF580109                             | --                                    |
| <i>Phyllobates</i>               | <i>terribilis</i>     | Black Jungle<br>Terrarium<br>Supply | NA              | NA             | purchased captive-bred<br>individual                        | MF580108                             | --                                    |
| <i>Rheobates</i>                 | <i>palmatus</i>       | 4.432908N,<br>-73.920662W           | Las Brisas      | Colombia       | ANDES-A2433 (RDT0125)                                       | MF580106                             | --                                    |
| <i>Silverstoneia</i>             | <i>cf. gutturalis</i> | 6.122443N<br>-77.444037W            | El Valle        | Colombia       | ANDES-A2444<br>(RDT0136)                                    | MF580099                             | --                                    |
| <i>Silverstoneia</i>             | <i>cf. nubicola</i>   | 3.847596N<br>-76.788457W            | El Valle        | Colombia       | ANDES-A2466 (RDT0158)                                       | MF580100                             | --                                    |
| <i>Bufo</i>                      | <i>nebulifer</i>      | 30.31865N,<br>-97.72620W            | Austin          | USA            | TNHC-FS6877                                                 | MF580082                             | MF580113                              |
| <i>Atelopus</i>                  | <i>elegans</i>        | NA                                  | captive raised  | Ecuador        | (JCS 2008)                                                  | MF580084                             | MF580115                              |

|                                      |                   |                         | from<br>Esmeraldas<br>Province |                |                                                                  |                                      |                                       |
|--------------------------------------|-------------------|-------------------------|--------------------------------|----------------|------------------------------------------------------------------|--------------------------------------|---------------------------------------|
| <b>Table S1 cont.</b>                |                   |                         |                                |                |                                                                  |                                      |                                       |
| <b>Genus</b>                         | <b>Species</b>    | <b>Coordinates</b>      | <b>Locality</b>                | <b>Country</b> | <b>Museum Number (Field Series) / Sequence Read Archive</b>      | <b>GenBank Accession No. (Chrn2)</b> | <b>GenBank Accession No. (Chrna4)</b> |
| <b>Non-dendrobatid anurans cont.</b> |                   |                         |                                |                |                                                                  |                                      |                                       |
| <i>Espadarana</i>                    | <i>callistoma</i> | 0.9123N,<br>-78.5835W   | Alto Tambo                     | Ecuador        | (JCS 2008)                                                       | MF580080                             | MF580117                              |
| <i>Gastrotheca</i>                   | <i>sp.</i>        | -3.40762S,<br>-79.1345W | Ñamarin                        | Ecuador        | (JCS 2008)                                                       | MF580105                             | MF580116                              |
| <i>Boana</i>                         | <i>picturata</i>  | 0.90775N,<br>-78.59968W | El Placer                      | Ecuador        | (JCS 2008)                                                       | MF580081                             | MF580114                              |
| <i>Rana</i>                          | <i>pipiens</i>    | NA                      | NA                             | NA             | SRR1185907, SRR1185248,<br>SRR1185905, SRR1185669,<br>SRR1185245 | --                                   | --                                    |
| <i>Xenopus</i>                       | <i>tropicalis</i> |                         |                                |                | NA                                                               | BC136136.1                           | NM_001113843.1                        |
| <b>Non-anuran outgroups</b>          |                   |                         |                                |                |                                                                  |                                      |                                       |
| <i>Gallus</i>                        | <i>gallus</i>     |                         |                                |                | NA                                                               | AJ250362.1                           | --                                    |
| <i>Homo</i>                          | <i>sapiens</i>    |                         |                                |                | NA                                                               | NM_000748.2                          | NM_000744.6                           |
| <i>Mus</i>                           | <i>musculus</i>   |                         |                                |                | NA                                                               | AF299083.1                           | --                                    |
| <i>Rattus</i>                        | <i>norvegicus</i> |                         |                                |                | NA                                                               | AY574258.1                           | --                                    |



**Table S2. Chrnb2 nucleotide alignment with AA residues and mutations of interest highlighted.**

|                                     | 106                                                                                                            | 108 | 110 | 118 |
|-------------------------------------|----------------------------------------------------------------------------------------------------------------|-----|-----|-----|
| <i>Gallus gallus</i>                | ATGTACGAGGTCTCC <b>TTCTAC</b> <b>TCCAAC</b> <b>GCCG</b> GTATCTCCTACGACGGCAGC <b>ATC</b> TTCTGGCTGCCCCCGCCATC   |     |     |     |
| <i>Anolis carolinensis</i>          | ATGTACGAGGTGTCC <b>TTCTAC</b> <b>TCCAAC</b> <b>GCGG</b> TGGTCTCCTTCGACGGGAGC <b>ATC</b> TTCTGGCTCCCGCCGGCCATC  |     |     |     |
| <i>Homo sapiens</i>                 | ATGTACGAGGTGTCC <b>TTCTAT</b> <b>TCCAAT</b> <b>GCCG</b> TGGTCTCCTATGATGGCAGC <b>ATC</b> TTCTGGCTGCCGCCTGCCATC  |     |     |     |
| <i>Rattus norvegicus</i>            | ATGTACGAAGTCTCC <b>TTCTAT</b> <b>TCCAAT</b> <b>GCTG</b> TGGTCTCCTATGATGGCAGC <b>ATC</b> TTTTGGCTACCACCTGCCATC  |     |     |     |
| <i>Mus musculus</i>                 | ATGTACGAAGTCTCC <b>TTCTAT</b> <b>TCCAAT</b> <b>GCTG</b> TGGTCTCCTATGATGGCAGC <b>ATC</b> TTTTGGCTACCCCGCCATC    |     |     |     |
| <i>Xenopus tropicalis</i>           | ATGTACGAGGTGTCC <b>TTCTAC</b> <b>TCCAAC</b> <b>GCGG</b> TGGTGTCCCACGACGGCAGC <b>ATA</b> TTCTGGTTGCCCCCTGCCATA  |     |     |     |
| <i>Rana pipiens</i>                 | ATGTATGAGGTGTCC <b>TTCTAC</b> <b>TCCAAC</b> <b>GCGG</b> TGTGTCTGATGGCAGC <b>ATC</b> TTTTGGTTGCCCTCCAGCCATC     |     |     |     |
| <i>Boana picturata</i>              | ATGTACGAGGTGTCC <b>TTCTAC</b> <b>TCCAAC</b> <b>GCGG</b> TGGTCTCCTATGACGGCAGC <b>ATC</b> TTCTGGCTTCCCTCCCGCCATC |     |     |     |
| <i>Gastrotheca sp.</i>              | ATGTACGAGGTCTCC <b>TTCTAC</b> <b>TCCAAC</b> <b>GCGG</b> TGGTCTCCTACGATGGCAGC <b>ATC</b> TTCTGGCTGCCCGCCATC     |     |     |     |
| <i>Espadarana callistomma</i>       | ATGTACGAGGTCTCC <b>TTCTAC</b> <b>TCCAAT</b> <b>GCGG</b> TGGTCTCCTACGATGGGAGC <b>ATC</b> TTCTGGCTTCCCTCCCGCCATC |     |     |     |
| <i>Atelopus elegans</i>             | ATGTACGAGGTCTCC <b>TTCTAC</b> <b>TCTAAC</b> <b>GCGG</b> TGGTCTCCTATGATGGCAGC <b>ATC</b> TTCTGGCTTCCCTCCTGTATC  |     |     |     |
| <i>Bufo nebulifer</i>               | ATGTACGAGGTCTCC <b>TTCTAC</b> <b>TCTAAC</b> <b>GCGG</b> TGGTCTCCTACGATGGGAGC <b>ATC</b> TTCTGGCTTCCCTCCCGCCATC |     |     |     |
| <i>Rheobates palmatus</i>           | ATGTACGAGGTCTCC <b>TTCTAC</b> <b>TCCAAC</b> <b>GCGG</b> TGGTCTCCTACGATGGCAGC <b>ATC</b> TTCTGGCTGCCCGCCATC     |     |     |     |
| <i>Allobates talamancae</i>         | ATGTACGAGGTCTCC <b>TTCTAC</b> <b>TCCAAC</b> <b>GCGG</b> TGGTCTCGCATGACGGCAGC <b>ATC</b> TTCTGGTTGCCCCCGCCATC   |     |     |     |
| <i>Allobates kingsburyi</i>         | ATGTACGAGGTCTCA <b>TTCTAC</b> <b>TCCAAT</b> <b>GCGG</b> TGGTCTCGCATGACGGCAGC <b>ATC</b> TTCTGGTACCCCGCCATC     |     |     |     |
| <i>Allobates femoralis</i>          | ATGTACGAGGTCTCC <b>TTCTAC</b> <b>TCTAAC</b> <b>GCGG</b> TGGTCTCGCATGATGGTAGC <b>ATC</b> TTCTGGCTGCCCGCCATC     |     |     |     |
| <i>Allobates zaparo</i>             | ATGTACGAGGTCTCC <b>TTCTAC</b> <b>TCCAAC</b> <b>GCGG</b> TGGTCTCGCATGATGGTAGC <b>ATC</b> TTCTGGCTGCCCGCCATC     |     |     |     |
| <i>Hyloxalus italoii</i>            | ATGTATGAGGTCTCC <b>TTCTAC</b> <b>TCTAAC</b> <b>GCGG</b> TGGTCTCGCACGACGGCAGC <b>ATC</b> TTCTGGCTGCCCCCTGCCATC  |     |     |     |
| <i>Hyloxalus jacobuspetersi</i>     | ATGTATGAGGTCTCC <b>TTCTAC</b> <b>TCTAAT</b> <b>GCA</b> GTGGTCTCGCACGACGGCAGC <b>ATC</b> TTCTGGCTGCCCGCCATC     |     |     |     |
| <i>Hyloxalus nexipus</i>            | ATGTATGAGGTCTCC <b>TTCTAC</b> <b>TCTAAC</b> <b>GCGG</b> TGGTCTCGCACGACGGTAGC <b>ATC</b> TTCTGGCTGCCCGCCATC     |     |     |     |
| <i>Phyllobates aurotaenia</i>       | ATGTATGAGGTCTCC <b>TTCTAC</b> <b>TCTAAC</b> <b>GCGG</b> TGGTCTCGCACGACGGCAGC <b>ATC</b> TTCTGGCTGCCCGCCATC     |     |     |     |
| <i>Phyllobates terribilis</i>       | ATGTATGAGGTCTCC <b>TTCTAC</b> <b>TCTAAC</b> <b>GCGG</b> TGGTCTCGCACGACGGCAGC <b>ATC</b> TTCTGGCTGCCCGCCATC     |     |     |     |
| <i>Dendrobates truncatus</i>        | ATGTATGAGGTCTCC <b>TTCTAC</b> <b>TCTAAC</b> <b>GCGG</b> TGGTCTCGCATGANGGCAGC <b>ATC</b> TTCTGGCTGCCACCCGCCATC  |     |     |     |
| <i>Dendrobates sylvaticus</i>       | ATGTATGAGGTCTCC <b>TTCTAC</b> <b>TGTAAT</b> <b>GCGG</b> TGGTCTCGCATGATGGCAGC <b>ATC</b> TTCTGGCTGCCACCTGCCATC  |     |     |     |
| <i>Dendrobates pumilio</i>          | ATGTATGAGGTCTCC <b>TTCTAC</b> <b>TGTAAT</b> <b>GCGG</b> TGGTCTCGCATGATGGCAGC <b>ATC</b> TTCTGGCTGCCACCCGCCATC  |     |     |     |
| <i>Dendrobates captivus</i>         | ATGTATGAGGTCTCC <b>TTCTAC</b> <b>TCTAAC</b> <b>GCGG</b> TGGTCTCGCACGACGGCAGC <b>ATC</b> TTCTGGCTGCCACCCGCCATC  |     |     |     |
| <i>Dendrobates fulguritus</i>       | ATGTACGAGGTCTCC <b>TTCTAC</b> <b>TCCAAC</b> <b>GCGG</b> TGGTCTCGCACGACGGCAGC <b>ATC</b> TTCTGGCTGCCCGCCATC     |     |     |     |
| <i>Dendrobates ventrimaculatus</i>  | ATGTATGAGGTCTCC <b>TTCTAC</b> <b>TCTAAC</b> <b>GCGG</b> TGGTCTCACACGACGGCAGC <b>ATC</b> TTCTGGCTGCCACCTGCCATT  |     |     |     |
| <i>Colostethus fugax</i>            | ATGTACGAGGTCTCC <b>TTCTAC</b> <b>TCTAAT</b> <b>GCA</b> GTGGTCTCGCATGATGGCAGC <b>ATC</b> TTCTGGCTGCCCGCCATC     |     |     |     |
| <i>Ameerega parvula</i>             | ATGTACGAGGTCTCC <b>TTCTAC</b> <b>TGTAAC</b> <b>GTG</b> TGGTCTCGCACGATGGCAGC <b>GTC</b> TTCTGGCTGCCCGCCATC      |     |     |     |
| <i>Ameerega bilineata</i>           | ATGTACGAGGTCTCC <b>TTCTAC</b> <b>TGTAAC</b> <b>GTG</b> TGGTCTCGCACGATGGCAGC <b>GTC</b> TTCTGGCTGCCCGCCATC      |     |     |     |
| <i>Ameerega hahneli</i>             | ATGTACGAGGTCTCC <b>TTCTAC</b> <b>TGTAAC</b> <b>GTG</b> TGGTCTCGCACGACGGCAGC <b>GTC</b> TTCTGGCTGCCCGCCATC      |     |     |     |
| <i>Ameerega trivittata</i>          | ATGTACGAGGTCTCC <b>TTCTAC</b> <b>TGTAAC</b> <b>GTG</b> TGGTCTCGCACGATGGCAGC <b>GTC</b> TTCTGGCTGCCCGCCATC      |     |     |     |
| <i>Silverstoneia cf. nubicola</i>   | ATGTATGAGGTCTCC <b>TTCTAC</b> <b>TCTAAT</b> <b>GCA</b> GTGGTCTCACATGACGGCAGC <b>ATC</b> TTCTGGCTGCCCGCCATC     |     |     |     |
| <i>Silverstoneia cf. gutturalis</i> | ATGTATGAGGTCTCC <b>TTCTAC</b> <b>TCTAAC</b> <b>GCA</b> GTGGTCTCACATGACGGCAGC <b>ATC</b> TTCTGGCTGCCCGCCATC     |     |     |     |
| <i>Epipedobates boulengeri</i>      | ATGTATGAGGTCTCC <b>CTCTAC</b> <b>TGTAAT</b> <b>GCA</b> GTGGTCTCACATGACGGCAGC <b>ATC</b> TTCTGGCTGCCCGCCATC     |     |     |     |
| <i>Epipedobates darwinwallacei</i>  | ATGTATGAGGTCTCC <b>CTCTAC</b> <b>TGTAAT</b> <b>GCA</b> GTGGTCTCACATGACGGCAGC <b>ATC</b> TTCTGGCTGCCCGCCATC     |     |     |     |
| <i>Epipedobates anthonyi</i>        | ATGTATGAGGTCTCC <b>CTCTAC</b> <b>TGTAAT</b> <b>GCA</b> GTGGTCTCACATGACGGCAGC <b>ATC</b> TTCTGGCTGCCCGCCATC     |     |     |     |
| <i>Epipedobates machalilla</i>      | ATGTATGAGGTCTCC <b>CTCTAC</b> <b>TGTAAT</b> <b>GCA</b> GTGGTCTCACATGACGGCAGC <b>ATC</b> TTCTGGCTGCCCGCCATC     |     |     |     |
| <i>Epipedobates tricolor</i>        | ATGTATGAGGTCTCC <b>CTCTAC</b> <b>TGTAAT</b> <b>GCA</b> GTGGTCTCACATGATGGCAGC <b>ATC</b> TTCTGGCTGCCCGCCATC     |     |     |     |

**Table S3. Chrna4 AA alignment with AA residues of interest highlighted.**

Amino acid replacements (highlighted) in chrna4 unique to *Epipedobates*, *Ameerega*, or *Dendrobates* (*Oophaga*). AA residue numbers are indicated above the alignment. Additional AA differences between human and *Epipedobates* near position 176 are underlined.

|                                | 17       | 32       | 39       | ...       | 176                      |         |          |            |                  |                |              |       |
|--------------------------------|----------|----------|----------|-----------|--------------------------|---------|----------|------------|------------------|----------------|--------------|-------|
| <i>Homo sapiens</i>            | HAEERLLK | KL       | FSGYNK   | WSRPVANIS | SDVVLVRFGLSIAQL          | DKAKIDL | VNMHSRVD | QLDFWESGEW | IVD              | AVGTYNTRKYECCA | EIYPDI       |       |
| <i>Xenopus tropicalis</i>      | HAEERLLK | KL       | FSGYNK   | WSRPVANIS | SDAVMVRFGLSIAQL          | DRAKIDL | ISMHSHVD | QLDYWESGEW | IVNAVGN          | YNIKKYECCTE    | IYSDI        |       |
| <i>Boana picturata</i>         | HAEERLLK | KL       | FKEYNK   | WSRPVANIS | SDAVLVRFGLSIAQL          | DRAKIDL | ISMHNHVD | QLDYWESGEW | IVNAVGN          | YNIKKYECCTE    | IYSDI        |       |
| <i>Espadarana callistomma</i>  | HAEERLLK | KL       | FMGYNK   | WSRPVANIS | SDAVLVRFGLSIAQL          | DRAKIDL | ISMHNHVD | QLDYWESGEW | IVNAVGN          | YNIKKYECCTE    | IYSDI        |       |
| <i>Gastrotheca sp.</i>         | HAEERLLK | KL       | FMEYNK   | WSRPVANIS | SDAVLVRFGLSIAQL          | DRAKIDL | ISMHNHVD | QLDYWESGEW | IVNAVGN          | YNIKKYECCTE    | IYSDI        |       |
| <i>Bufo nebulifer</i>          | HAEERLLK | KL       | FMAYNK   | WSRPVANIS | SDAVLVRFGLSIAQL          | DRAKIDL | ISMHNHVD | QLDYWESGEW | IVNAVGN          | YNIKKYECCTE    | IYSDI        |       |
| <i>Atelopus elegans</i>        | HAEERLLK | KL       | FMAYNK   | WSRPVANIS | SDAVLVRFGLSIAQL          | DRAKIDL | ISMHNHVD | QLDYWESGEW | IVNAVGN          | YNIKKYECCTE    | IYSDI        |       |
| <i>Allobates zaparo</i>        | HAEERLLK | KL       | FLGYNK   | WSRPVANIS | SDAVLVRFGLSIAQL          | DRAKIDL | ISMHSHVD | QLDYWESGEW | IVNAVGN          | YNIKKYECCTE    | IYSDI        |       |
| <i>Allobates talamancae</i>    | HAEERLLK | KL       | FLGYNK   | WSRPVANIS | SDAVLVRFGLSIAQL          | DRAKIDL | ISMHSHVD | QLDYWESGEW | IVNAVGN          | YNIKKYECCTE    | IYSDI        |       |
| <i>Hyloxalus italo</i>         | HAEERLLK | KL       | FMGYNK   | WSRPVANIS | SDAVLVRFGLSIAQL          | DRAKIDL | ISMHSHVD | QLDYWESGEW | IVNAVGN          | YNIKKYECCTE    | IYSDI        |       |
| <i>Hyloxalus nexipus</i>       | HAEERLLK | KL       | FMGYNK   | WSRPVANIS | SDAVLVRFGLSIAQL          | DKAKIDL | ISMHSHVD | QLDYWESGEW | IVNAVGN          | YNIKKYECCTE    | IYSDI        |       |
| <i>Dendrobates sylvaticus</i>  | HAEERLL  | <b>Q</b> | ELFMGYNK | WSRPVANIS | SDAVLVRFGLSIAQL          | DKAKIDL | ISMHNHVD | QLDYWESGEW | IVNAVGN          | YNIKKYECCTE    | IYSDI        |       |
| <i>Colostethus fugax</i>       | HAEERLLK | KL       | FMGYNK   | WSRPVANIS | SDAVLVRFGLSIAQL          | DKAKIDL | ISMHSHVD | QLDYWESGEW | IVNAVGN          | YNIKKYECCTE    | IYSDI        |       |
| <i>Ameerega parvula</i>        | HAEERLLK | N        | LFMGYNK  | WSRPVAN   | <b>T</b> SDAVLVLFGLSIAQL | DKAKIDL | ISMHNHVD | QLDYWESGEW | IVNAVGN          | YNIKKYECCTE    | IYSDI        |       |
| <i>Ameerega bilinguis</i>      | HAEERLLK | N        | LFMGYNK  | WSRPVAN   | <b>T</b> SDAVLVLFGLSIAQL | DKAKIDL | ISMHNHVD | QLDYWESGEW | IVNAVGN          | YNIKKYECCTE    | IYSDI        |       |
| <i>Ameerega hahneli</i>        | HAEERLLK | N        | LFMGYNK  | WSRPVAN   | <b>T</b> SDAVLVLFGLSIAQL | DKAKIDL | ISMHNHVD | QLDYWESGEW | IVNAVGN          | YNIKKYECCTE    | IYSDI        |       |
| <i>Phyllobates terribilis</i>  | -----    |          |          |           |                          | DRAKIDL | ISMHSHVD | QLDYWESGEW | IVNAVGN          | YNIKKYECCTE    | IYSDI        |       |
| <i>Epipedobates anthonyi</i>   | HAEERLLK | KL       | FMGYNK   | WSRPVANIS | SDAVLVRFGLSIAQL          | DKAKIDL | ISMHSHVD | QL         | <b>N</b> YWESGEW | IVNAVGN        | YNIKKYECCTE  | IYSDI |
| <i>Epipedobates tricolor</i>   | -----    |          |          |           |                          | DKAKIDL | ISMHSHVD | QL         | <b>N</b> YWESGEW | IVNAVGN        | YNIKKYE----- |       |
| <i>Epipedobates boulengeri</i> | HAEERLLK | KL       | FMGYNK   | WSRPVANIS | SDAVLVRFGLAIAQL          | DRAKIDL | ISMHSHVD | QL         | <b>N</b> YWESGEW | IVNAVGN        | YNIKKYECCTE  | IYSDI |

**Table S4. Accession numbers for sequences used in Fig. 1 phylogeny.**

GenBank accession numbers for genes used to infer the reference phylogeny for Figure 1. Photographs in the figure are of individuals QCAZA58255 (*D. [O.] sylvaticus*), QCAZA58327 (*A. hahneli*), QCAZA58321 (*A. bilinguis*), QCAZA58301 (*E. tricolor*), and QCAZA53675 (*E. anthonyi*).

| Genus                | Species                | 12S-16S-ND2                        | CYTB     |
|----------------------|------------------------|------------------------------------|----------|
| <i>Gallus</i>        | <i>gallus</i>          | X52392                             | X52392   |
| <i>Homo</i>          | <i>sapiens</i>         | KJ446330                           | KJ446330 |
| <i>Rattus</i>        | <i>norvegicus</i>      | KF011917                           | KF011917 |
| <i>Mus</i>           | <i>musculus</i>        | AB042432                           | AB042432 |
| <i>Xenopus</i>       | <i>tropicalis</i>      | AY789013                           | AY789013 |
| <i>Rana</i>          | <i>yavapaiensis</i>    | DQ283272<br>GU184243               | GU184212 |
| <i>Boana</i>         | <i>picturata</i>       | AY326055                           | --       |
| <i>Mantella</i>      | <i>aurantiaca</i>      | DQ283035                           | AY723593 |
| <i>Gastrotheca</i>   | <i>sp.</i>             | DQ679247<br>KJ489515               | --       |
| <i>Espadarana</i>    | <i>callistomma</i>     | EU663340,<br>EU663076,<br>EU662981 | --       |
| <i>Atelopus</i>      | <i>elegans</i>         | MF619959                           | MF598761 |
| <i>Bufo</i>          | <i>nebulifer</i>       | HQ290945                           | HQ290525 |
| <i>Rheobates</i>     | <i>palmatus</i>        | HQ290967                           | HQ290545 |
| <i>Allobates</i>     | <i>talamancae</i>      | HQ290974                           | HQ290552 |
| <i>Allobates</i>     | <i>kingsburyi</i>      | HQ290963                           | HQ290541 |
| <i>Allobates</i>     | <i>femorialis</i>      | HQ290951                           | HQ290531 |
| <i>Allobates</i>     | <i>zaparo</i>          | HQ291003                           | HQ290580 |
| <i>Hyloxalus</i>     | <i>italoi</i>          | HQ290972                           | HQ290550 |
| <i>Hyloxalus</i>     | <i>jacobsperi</i>      | MF619960                           | MF598762 |
| <i>Hyloxalus</i>     | <i>nexipus</i>         | HQ290965                           | HQ290543 |
| <i>Phyllobates</i>   | <i>aurotaenia</i>      | HQ291005                           | HQ290582 |
| <i>Phyllobates</i>   | <i>terribilis</i>      | HQ291006                           | HQ290583 |
| <i>Dendrobates</i>   | <i>truncatus</i>       | HQ290992                           | HQ290569 |
| <i>Dendrobates</i>   | <i>sylvaticus</i>      | HQ290990                           | HQ290567 |
| <i>Dendrobates</i>   | <i>pumilio</i>         | HQ290988                           | HQ290565 |
| <i>Dendrobates</i>   | <i>captivus</i>        | HQ290982                           | HQ290559 |
| <i>Dendrobates</i>   | <i>fulguritus</i>      | HQ290989                           | HQ290566 |
| <i>Dendrobates</i>   | <i>ventrimaculatus</i> | HQ290979                           | HQ290556 |
| <i>Colostethus</i>   | <i>fugax</i>           | HQ290958                           | HQ290538 |
| <i>Ameerega</i>      | <i>parvula</i>         | HQ290999                           | HQ290576 |
| <i>Ameerega</i>      | <i>bilinguis</i>       | HQ290996                           | HQ290573 |
| <i>Ameerega</i>      | <i>hahneli</i>         | HQ290998                           | HQ290575 |
| <i>Ameerega</i>      | <i>trivittata</i>      | HQ291002                           | HQ290579 |
| <i>Silverstoneia</i> | <i>nubicola</i>        | HQ290966                           | HQ290544 |
| <i>Silverstoneia</i> | <i>flotator</i>        | HQ290957                           | HQ290537 |

| <b>Table S4 cont.</b> |                       |                    |             |
|-----------------------|-----------------------|--------------------|-------------|
| <b>Genus</b>          | <b>Species</b>        | <b>12S-16S-ND2</b> | <b>CYTB</b> |
| <i>Epipedobates</i>   | <i>anthonyi</i>       | HQ290995           | HQ290572    |
| <i>Epipedobates</i>   | <i>tricolor</i>       | HQ291001           | HQ290578    |
| <i>Epipedobates</i>   | <i>machalilla</i>     | HQ290964           | HQ290542    |
| <i>Epipedobates</i>   | <i>boulengeri</i>     | HQ290997           | HQ290574    |
| <i>Epipedobates</i>   | <i>darwinwallacei</i> | HQ291000           | HQ290577    |

**Table S5. Concentration-response curve parameters from human  $\alpha 4\beta 2$  nAChR containing  $\beta 2$  subunits mutated to have *Epipedobates* amino acids.**

Please note that the single mutant LCAI also corresponds to the *Dendrobates* (*Oophaga*) AA replacement pattern.  $EC_{50}$ , effective concentration 50;  $n_H$ , Hill coefficient;  $n$ , number of oocytes; % Max Resp, % of maximal ACh responses. Data is presented as mean (95% confidence interval) or mean  $\pm$  SEM. 1:3 and 3:1 indicate the  $\alpha 4:\beta 2$  cRNA ratio injected. Two values are given where the CRC is biphasic (one high and one low sensitivity).

| Ligand      | Genotype | 1:3                              |                            |                                |     | 3:1                               |                            |                                |     |
|-------------|----------|----------------------------------|----------------------------|--------------------------------|-----|-----------------------------------|----------------------------|--------------------------------|-----|
|             |          | $EC_{50}$ ( $\mu$ M)             | % Maximal Response         | $n_H$                          | $n$ | $EC_{50}$ ( $\mu$ M)              | % Maximal Response         | $n_H$                          | $n$ |
| ACh         | FSAI     | 1.3 (1.1 – 1.5)                  | 99 $\pm$ 2                 | 1.1 $\pm$ 0.1                  | 7   | 7.4 (4.2 – 13)                    | 99 $\pm$ 5                 | 0.6 $\pm$ 0.1                  | 9   |
|             | LCAI     | 1.4 (1.0 – 2.2)                  | 97 $\pm$ 4                 | 0.9 $\pm$ 0.1                  | 6   | 68 (32 – 147)                     | 111 $\pm$ 9                | 0.6 $\pm$ 0.1                  | 6   |
|             | LSAI     | 1.1 (1.0 – 1.3)                  | 98 $\pm$ 2                 | 1.2 $\pm$ 0.1                  | 6   | 8.7 (0.8 – 111)<br>120 (96 – 149) | 42 $\pm$ 21<br>53 $\pm$ 19 | 0.8 $\pm$ 0.3<br>2.5 $\pm$ 1.0 | 6   |
|             | FCAI     | 3.1 (0.4 – 26)<br>136 (92 – 202) | 33 $\pm$ 12<br>54 $\pm$ 12 | 0.9 $\pm$ 0.6<br>3.1 $\pm$ 1.5 | 6   | 155 (92 – 263)                    | 105 $\pm$ 8                | 0.9 $\pm$ 0.1                  | 4   |
| Epibatidine | FSAI     | 5.2 (3.3 – 8.3)                  | 78 $\pm$ 6                 | 1.8 $\pm$ 0.6                  | 9   | 45 (29 – 68)                      | 452 $\pm$ 23               | 0.9 $\pm$ 0.1                  | 9   |
|             | LCAI     | 88 (60 – 128)                    | 79 $\pm$ 3                 | 0.9 $\pm$ 0.1                  | 6   | 190 (157 – 231)                   | 197 $\pm$ 5                | 1.2 $\pm$ 0.1                  | 4   |
|             | LSAI     | 4.1 (3.0 – 5.7)                  | 55 $\pm$ 3                 | 2.1 $\pm$ 0.6                  | 6   | 44 (16 – 120)                     | 327 $\pm$ 41               | 0.7 $\pm$ 0.2                  | 6   |
|             | FCAI     | 256 (205 – 321)                  | 137 $\pm$ 4                | 1.4 $\pm$ 0.2                  | 4   | 267 (208 – 343)                   | 151 $\pm$ 6                | 1.7 $\pm$ 0.3                  | 5   |

**Table S6. Concentration-response curve parameters from human  $\alpha 4\beta 2$  nAChR containing  $\beta 2$  subunits mutated to have *Ameerega* amino acids.**

Please note that the single mutant LCAI also corresponds to the *Dendrobates (Oophaga)* AA replacement pattern.  $EC_{50}$ , effective concentration 50;  $n_H$ , Hill coefficient;  $n$ , number of oocytes; % Max Resp, % of maximal ACh response. Data is presented as mean (95% confidence interval) or mean  $\pm$  SEM. 1:3 and 3:1 indicate the  $\alpha 4:\beta 2$  cRNA ratio injected. Two values are given where the CRC is biphasic (one high and one low sensitivity).

| Ligand      | Genotype | 1:3                                 |                            |                                |     | 3:1                               |                            |                                |     |
|-------------|----------|-------------------------------------|----------------------------|--------------------------------|-----|-----------------------------------|----------------------------|--------------------------------|-----|
|             |          | $EC_{50}$ ( $\mu$ M)                | % Maximal Response         | $n_H$                          | $n$ | $EC_{50}$ ( $\mu$ M)              | % Maximal Response         | $n_H$                          | $n$ |
| ACh         | FSAI     | 1.2 (1.1 – 1.3)                     | 98 $\pm$ 1                 | 1.1 $\pm$ 0.1                  | 13  | 1.3 (0.7 – 2.5)<br>131 (75 – 229) | 58 $\pm$ 7<br>38 $\pm$ 9   | 1.0 $\pm$ 0.2<br>1.9 $\pm$ 0.9 | 18  |
|             | FCVV     | 0.8 (0.7 – 0.9)                     | 96 $\pm$ 1                 | 1.0 $\pm$ 0.1                  | 6   | 0.6 (0.1 – 4.3)<br>110 (80 – 151) | 18 $\pm$ 8<br>91 $\pm$ 12  | 1.0 $\pm$ 0.5<br>1.0 $\pm$ 0.2 | 5   |
|             | FCVI     | 20 (7 – 62)                         | 110 $\pm$ 11               | 0.5 $\pm$ 0.1                  | 6   | 3.7 (0.1 – 115)<br>117 (79 – 172) | 36 $\pm$ 21<br>60 $\pm$ 21 | 0.7 $\pm$ 0.3<br>1.7 $\pm$ 0.5 | 6   |
|             | FCAV     | 1.3 (0.8 – 2.0)                     | 93 $\pm$ 4                 | 1.0 $\pm$ 0.2                  | 6   | 142 (70 – 287)                    | 117 $\pm$ 12               | 0.8 $\pm$ 0.2                  | 6   |
|             | FSVV     | 1.04 (0.7 – 1.7)<br>244 (102 – 582) | 63 $\pm$ 6<br>44 $\pm$ 15  | 0.5 $\pm$ 0.1                  | 5   | 1.7 (0 – 136)<br>201 (140 – 290)  | 12 $\pm$ 11<br>93 $\pm$ 14 | 0.9 $\pm$ 0.8<br>1.1 $\pm$ 0.2 | 4   |
|             | FCAI     | 3.2 (0.3 – 35)<br>163 (106 – 252)   | 33 $\pm$ 13<br>62 $\pm$ 14 | 0.6 $\pm$ 0.1                  | 6   | 196 (107 – 359)                   | 114 $\pm$ 10               | 0.8 $\pm$ 0.1                  | 6   |
|             | FSVI     | 1.1 (1.0 – 1.3)                     | 97 $\pm$ 1                 | 1.1 $\pm$ 0.1                  | 4   | 69 (15 – 320)                     | 108 $\pm$ 14               | 0.4 $\pm$ 0.1                  | 6   |
|             | FSAV     | 8 (0.6 – 118)<br>124 (89 – 171)     | 34 $\pm$ 18<br>57 $\pm$ 17 | 1.0 $\pm$ 0.1<br>4.1 $\pm$ 3.3 | 5   | 17 (0 – 11,000)<br>123 (92 – 162) | 42 $\pm$ 52<br>58 $\pm$ 44 | 0.7 $\pm$ 0.4<br>2.7 $\pm$ 2.2 | 5   |
| Epibatidine | FSAI     | 5.3 (3.6 – 7.7)                     | 71 $\pm$ 5                 | 1.9 $\pm$ 0.5                  | 17  | 49 (33 – 74)                      | 417 $\pm$ 21               | 1.0 $\pm$ 0.2                  | 14  |
|             | FCVV     | 31 (19 – 51)                        | 62 $\pm$ 3                 | 1.1 $\pm$ 0.2                  | 6   | 172 (139 – 212)                   | 150 $\pm$ 4                | 1.3 $\pm$ 0.2                  | 6   |
|             | FCVI     | 162 (101 – 259)                     | 125 $\pm$ 9                | 1.2 $\pm$ 0.2                  | 6   | 181 (128 – 256)                   | 178 $\pm$ 8                | 1.3 $\pm$ 0.2                  | 5   |
|             | FCAV     | 184 (94 – 358)                      | 104 $\pm$ 11               | 1.1 $\pm$ 0.3                  | 5   | 171 (120 – 245)                   | 154 $\pm$ 8                | 1.5 $\pm$ 0.4                  | 5   |
|             | FSVV     | 113 (50 to 253)                     | 279 $\pm$ 23               | 0.7 $\pm$ 0.2                  | 4   | 237 (156 – 360)                   | 458 $\pm$ 25               | 1.0 $\pm$ 0.2                  | 5   |
|             | FCAI     | 256 (205 – 321)                     | 137 $\pm$ 4                | 1.4 $\pm$ 0.2                  | 4   | 267 (208 – 343)                   | 151 $\pm$ 6                | 1.7 $\pm$ 0.3                  | 5   |
|             | FSVI     | 6.5 (4.3 – 10)                      | 71 $\pm$ 6                 | 2.6 $\pm$ 0.9                  | 6   | 150 (56 – 405)                    | 676 $\pm$ 80               | 0.8 $\pm$ 0.2                  | 5   |
|             | FSAV     | 395 (290 – 537)                     | 184 $\pm$ 9                | 1.2 $\pm$ 0.2                  | 5   | 201 (130 – 310)                   | 306 $\pm$ 19               | 1.5 $\pm$ 0.4                  | 5   |

**Table S7. Concentration-response curve parameters from *Epipedobates*  $\alpha$ 4 $\beta$ 2 nAChR containing  $\beta$ 2 nAChR mutated to have human amino acids.**

*EC*<sub>50</sub>, effective concentration 50; *n*<sub>H</sub>, Hill coefficient; *n*, number of oocytes; % Max Resp, % of maximal ACh response. Data is presented as mean (95% confidence interval) or mean  $\pm$  SEM. 1:7 and 7:1 indicate the  $\alpha$ 4: $\beta$ 2 cRNA ratio injected.

| Ligand      | Genotype | 1:7                                |                    |                       |          | 7:1                                |                    |                       |          |
|-------------|----------|------------------------------------|--------------------|-----------------------|----------|------------------------------------|--------------------|-----------------------|----------|
|             |          | <i>EC</i> <sub>50</sub> ( $\mu$ M) | % Maximal Response | <i>n</i> <sub>H</sub> | <i>n</i> | <i>EC</i> <sub>50</sub> ( $\mu$ M) | % Maximal Response | <i>n</i> <sub>H</sub> | <i>n</i> |
| ACh         | LCAI     | 0.42 (0.38 – 0.48)                 | 98 $\pm$ 1         | 1.2 $\pm$ 0.1         |          | 0.45 (0.36 – 0.57)                 | 98 $\pm$ 2         | 1.0 $\pm$ 0.1         | 13       |
|             | FSAI     | 0.44 (0.34 – 0.57)                 | 95 $\pm$ 3         | 1.2 $\pm$ 0.1         | 6        | 0.58 (0.41 – 0.84)                 | 97 $\pm$ 3         | 0.8 $\pm$ 0.1         | 5        |
|             | FCAI     | 0.87 (0.71 – 1.1)                  | 98 $\pm$ 2         | 1.1 $\pm$ 0.1         | 5        | 0.83 (0.71 – 0.97)                 | 98 $\pm$ 2         | 1.0 $\pm$ 0.1         | 6        |
|             | LSAI     | 0.51 (0.36 – 0.76)                 | 98 $\pm$ 4         | 1.0 $\pm$ 0.1         | 5        | 0.47 (0.40 – 0.55)                 | 98 $\pm$ 2         | 1.1 $\pm$ 0.1         | 5        |
| Epibatidine | LCAI     | 15 (10 – 22)                       | 30 $\pm$ 2         | 1.5 $\pm$ 0.3         | 6        | 25 (11 – 210)                      | 94 $\pm$ 12        | 1.1 $\pm$ 0.4         | 8        |
|             | FSAI     | 0.34 (0.28 – 0.48)                 | 70 $\pm$ 4         | 4.0 $\pm$ 4.8         | 5        | 0.71 (0.59 – 0.84)                 | 50 $\pm$ 1         | 1.8 $\pm$ 0.2         | 7        |
|             | FCAI     | 47 (37 – 60)                       | 30 $\pm$ 1         | 1.2 $\pm$ 0.1         | 4        | 67 (34 – 236)                      | 51 $\pm$ 6         | 1.3 $\pm$ 0.5         | 5        |
|             | LSAI     | 0.6 (0.4 – 1.0)                    | 55 $\pm$ 5         | 1.6 $\pm$ 0.4         | 4        | 0.9 (0.59 – 0.84)                  | 115 $\pm$ 17       | 1.3 $\pm$ 0.8         | 8        |

**Table S8. Concentration-response curve parameters from  $\alpha 4\beta 2$  nAChR composed of human and *Epipedobates* subunits ( $\alpha 4:\beta 2$  cRNA ratio 7:1).**

Human (*H*) wild-type  $\alpha 4\beta 2$  nAChRs [ $\alpha 4$ (D) and  $\beta 2$ (FSAI) genotypes], *Epipedobates* (*E*) wild-type  $\alpha 4\beta 2$  nAChRs [ $\alpha 4$ (N) and  $\beta 2$ (LCAI) genotypes], and combinations incorporating the mirror AA replacement patterns in  $\alpha 4$  (D and N), as well as the *Epipedobates*  $\beta 2$ (FCAI) genotype.  $EC_{50}$ , effective concentration 50;  $nH$ , Hill coefficient;  $n$ , number of oocytes; % Max Resp, % of maximal ACh response; *H*, human; *E*, *Epipedobates*. Data is presented as mean (95% confidence interval) or mean  $\pm$  SEM. Two values are given where the CRC is biphasic (one high and one low sensitivity).

| Ligand                                            | Receptor (Genotype)                               | 7:1                  |                    |               |     |
|---------------------------------------------------|---------------------------------------------------|----------------------|--------------------|---------------|-----|
|                                                   |                                                   | $EC_{50}$ ( $\mu$ M) | % Maximal Response | $n_H$         | $n$ |
| ACh                                               | <i>E</i> $\alpha 4$ (N) <i>E</i> $\beta 2$ (LCAI) | 0.45 (0.31 to 0.67)  | 97 $\pm$ 4         | 1.1 $\pm$ 0.2 | 4   |
|                                                   | <i>E</i> $\alpha 4$ (D) <i>E</i> $\beta 2$ (LCAI) | 0.42 (0.37 to 0.48)  | 96 $\pm$ 1         | 1.3 $\pm$ 0.1 | 5   |
|                                                   | <i>E</i> $\alpha 4$ (N) <i>H</i> $\beta 2$ (FSAI) | 0.3 (0.25 to 0.37)   | 100 $\pm$ 2        | 0.9 $\pm$ 0.1 | 6   |
|                                                   | <i>H</i> $\alpha 4$ (D) <i>H</i> $\beta 2$ (FSAI) | 5.4 (0.21 to 191)    | 30 $\pm$ 29        | 0.8 $\pm$ 0.5 | 3   |
|                                                   |                                                   | 178 (109 to 330)     | 70 $\pm$ 30        | 1.6 $\pm$ 0.6 |     |
|                                                   | <i>H</i> $\alpha 4$ (N) <i>H</i> $\beta 2$ (FSAI) | 6.0 (0.5 to 147)     | 25 $\pm$ 13        | 0.6 $\pm$ 0.3 | 6   |
|                                                   |                                                   | 387 (303 to 492)     | 71 $\pm$ 13        | 1.9 $\pm$ 0.4 |     |
| <i>H</i> $\alpha 4$ (D) <i>E</i> $\beta 2$ (LCAI) | 26 (9.3 to 176)                                   | 107 $\pm$ 12         | 0.5 $\pm$ 0.1      | 5             |     |
| <i>H</i> $\alpha 4$ (D) <i>E</i> $\beta 2$ (FCAI) | 3.2 (1.1 to 17)                                   | 38 $\pm$ 9           | 1.0 $\pm$ 0.3      | 4             |     |
|                                                   | 134 (97 to 186)                                   | 60 $\pm$ 9           | 1.9 $\pm$ 0.4      |               |     |



**Table S9. Statistical comparisons of the effect of receptor stoichiometry and genotype on response to epibatidine ( $\log EC_{50}$ ) of Human-to-*Epipedobates* mutated nAChRs. HS: high sensitivity (1:7 ratio); LS: low sensitivity (7:1 ratio).**

**A. Two-way ANOVA**

| Source of Variation       | % of total variation | SS (Type III) | DF  | MS     | F (DFn, DFd)       | P value |
|---------------------------|----------------------|---------------|-----|--------|--------------------|---------|
| Interaction               | 4.193                | 13.84         | 3   | 4.612  | F (3, 337) = 8.217 | <0.001  |
| Stoichiometry (HS vs. LS) | 8.011                | 26.44         | 1   | 26.44  | F (1, 337) = 47.10 | <0.001  |
| Receptor Genotype         | 30.48                | 100.6         | 3   | 33.53  | F (3, 337) = 59.73 | <0.001  |
| Residual                  |                      | 189.2         | 337 | 0.5613 |                    |         |

**B. Tukey's multiple comparisons test.**

| Receptor Comparison | Mean Difference $\pm$ SE | q     | Adjusted P Value |
|---------------------|--------------------------|-------|------------------|
| HS:FSAI vs. HS:LCAI | -1.227 $\pm$ 0.151       | 11.52 | <0.001           |
| HS:FSAI vs. HS:FCAI | -1.693 $\pm$ 0.172       | 13.89 | <0.001           |
| HS:FSAI vs. HS:LSAI | 0.100 $\pm$ 0.166        | 0.853 | 0.999            |
| HS:FSAI vs. LS:FSAI | -0.933 $\pm$ 0.136       | 9.703 | <0.001           |
| HS:FSAI vs. LS:LCAI | -1.563 $\pm$ 0.172       | 12.83 | <0.001           |
| HS:FSAI vs. LS:FCAI | -1.710 $\pm$ 0.167       | 14.45 | <0.001           |
| HS:FSAI vs. LS:LSAI | -0.929 $\pm$ 0.154       | 8.522 | <0.001           |
| HS:LCAI vs. HS:FCAI | -0.466 $\pm$ 0.174       | 3.776 | 0.136            |
| HS:LCAI vs. HS:LSAI | 1.327 $\pm$ 0.168        | 11.17 | <0.001           |
| HS:LCAI vs. LS:FSAI | 0.294 $\pm$ 0.139        | 3.002 | 0.402            |
| HS:LCAI vs. LS:LCAI | -0.336 $\pm$ 0.174       | 2.728 | 0.532            |
| HS:LCAI vs. LS:FCAI | -0.483 $\pm$ 0.169       | 4.033 | 0.086            |
| HS:LCAI vs. LS:LSAI | 0.298 $\pm$ 0.156        | 2.695 | 0.548            |
| HS:FCAI vs. HS:LSAI | 1.793 $\pm$ 0.188        | 13.51 | <0.001           |
| HS:FCAI vs. LS:FSAI | 0.760 $\pm$ 0.162        | 6.637 | <0.001           |
| HS:FCAI vs. LS:LCAI | 0.129 $\pm$ 0.194        | 0.945 | 0.998            |
| HS:FCAI vs. LS:FCAI | -0.018 $\pm$ 0.189       | 0.132 | >0.999           |
| HS:FCAI vs. LS:LSAI | 0.764 $\pm$ 0.177        | 6.087 | <0.001           |
| HS:LSAI vs. LS:FSAI | -1.033 $\pm$ 0.155       | 9.431 | <0.001           |
| HS:LSAI vs. LS:LCAI | -1.663 $\pm$ 0.188       | 12.53 | <0.001           |
| HS:LSAI vs. LS:FCAI | -1.810 $\pm$ 0.183       | 13.98 | <0.001           |
| HS:LSAI vs. LS:LSAI | -1.029 $\pm$ 0.171       | 8.506 | <0.001           |
| LS:FSAI vs. LS:LCAI | -0.630 $\pm$ 0.162       | 5.508 | 0.003            |
| LS:FSAI vs. LS:FCAI | -0.777 $\pm$ 0.157       | 7.023 | <0.001           |
| LS:FSAI vs. LS:LSAI | 0.004 $\pm$ 0.142        | 0.040 | >0.999           |
| LS:LCAI vs. LS:FCAI | -0.147 $\pm$ 0.189       | 1.098 | 0.994            |
| LS:LCAI vs. LS:LSAI | 0.634 $\pm$ 0.177        | 5.057 | 0.009            |
| LS:FCAI vs. LS:LSAI | 0.781 $\pm$ 0.173        | 6.403 | <0.001           |

**Table S10. Statistical comparisons of the effect of receptor stoichiometry and genotype on response to epibatidine (maximal current) of Human-to-*Epipedobates* mutated nAChRs.** HS: high sensitivity (1:7 ratio); LS: low sensitivity (7:1 ratio).

**A. Two-way ANOVA**

| Source of Variation       | % of total variation | SS (Type III) | DF  | MS      | F (DFn, DFd)       | P value |
|---------------------------|----------------------|---------------|-----|---------|--------------------|---------|
| Interaction               | 12.93                | 1508445       | 3   | 502815  | F (3, 337) = 26.62 | <0.001  |
| Stoichiometry (HS vs. LS) | 25.56                | 2982874       | 1   | 2982874 | F (1, 337) = 157.9 | <0.001  |
| Receptor Genotype         | 6.978                | 814334        | 3   | 271445  | F (3, 337) = 14.37 | <0.001  |
| Residual                  |                      | 6365012       | 337 | 18887   |                    |         |

**B. Tukey's multiple comparisons test.**

| Receptor Comparison | Mean Difference ± SE | q     | Adjusted P Value |
|---------------------|----------------------|-------|------------------|
| HS:FSAI vs. HS:LCAI | -0.990 ± 27.64       | 0.051 | >0.999           |
| HS:FSAI vs. HS:FCAI | -58.72 ± 31.62       | 2.626 | 0.582            |
| HS:FSAI vs. HS:LSAI | 22.96 ± 30.43        | 1.067 | 0.995            |
| HS:FSAI vs. LS:FSAI | -373.9 ± 24.94       | 21.20 | <0.001           |
| HS:FSAI vs. LS:LCAI | -119.2 ± 31.62       | 5.332 | 0.005            |
| HS:FSAI vs. LS:FCAI | -72.82 ± 30.70       | 3.354 | 0.259            |
| HS:FSAI vs. LS:LSAI | -248.7 ± 28.28       | 12.44 | <0.001           |
| HS:LCAI vs. HS:FCAI | -57.73 ± 31.99       | 2.553 | 0.617            |
| HS:LCAI vs. HS:LSAI | 23.95 ± 30.81        | 1.099 | 0.994            |
| HS:LCAI vs. LS:FSAI | -372.9 ± 25.40       | 20.76 | <0.001           |
| HS:LCAI vs. LS:LCAI | -118.2 ± 31.99       | 5.227 | 0.006            |
| HS:LCAI vs. LS:FCAI | -71.83 ± 31.08       | 3.269 | 0.291            |
| HS:LCAI vs. LS:LSAI | -247.7 ± 28.68       | 12.21 | <0.001           |
| HS:FCAI vs. HS:LSAI | 81.68 ± 34.43        | 3.355 | 0.258            |
| HS:FCAI vs. LS:FSAI | -315.2 ± 29.69       | 15.01 | <0.001           |
| HS:FCAI vs. LS:LCAI | -60.50 ± 35.48       | 2.411 | 0.684            |
| HS:FCAI vs. LS:FCAI | -14.10 ± 34.67       | 0.575 | >0.999           |
| HS:FCAI vs. LS:LSAI | -190.0 ± 32.54       | 8.258 | <0.001           |
| HS:LSAI vs. LS:FSAI | -396.9 ± 28.41       | 19.75 | <0.001           |
| HS:LSAI vs. LS:LCAI | -142.2 ± 34.43       | 5.841 | 0.001            |
| HS:LSAI vs. LS:FCAI | -95.78 ± 33.58       | 4.033 | 0.086            |
| HS:LSAI vs. LS:LSAI | -271.7 ± 31.38       | 12.24 | <0.001           |
| LS:FSAI vs. LS:LCAI | 254.7 ± 29.69        | 12.13 | <0.001           |
| LS:FSAI vs. LS:FCAI | 301.1 ± 28.71        | 14.83 | <0.001           |
| LS:FSAI vs. LS:LSAI | 125.2 ± 26.10        | 6.785 | <0.001           |
| LS:LCAI vs. LS:FCAI | 46.40 ± 34.67        | 1.893 | 0.884            |
| LS:LCAI vs. LS:LSAI | -129.5 ± 32.54       | 5.628 | 0.002            |
| LS:FCAI vs. LS:LSAI | -175.9 ± 31.65       | 7.860 | <0.001           |

**Table S11. Statistical comparisons of the effect of receptor stoichiometry and genotype on response to epibatidine ( $\log EC_{50}$ ) of Human-to-*Ameerega* mutated nAChRs. HS: high sensitivity (1:3 ratio); LS: low sensitivity (3:1 ratio).**

**A. Two-way ANOVA**

| Source of Variation       | % of total variation | SS (Type III) | DF  | MS    | F (DFn, DFd)       | P value |
|---------------------------|----------------------|---------------|-----|-------|--------------------|---------|
| Interaction               | 7.593                | 45.47         | 7   | 6.496 | F (7, 719) = 11.23 | <0.001  |
| Stoichiometry (HS vs. LS) | 4.035                | 24.16         | 1   | 24.16 | F (1, 719) = 41.79 | <0.001  |
| Receptor Genotype         | 18.95                | 113.5         | 7   | 16.21 | F (7, 719) = 28.04 | <0.001  |
| Residual                  |                      | 415.7         | 719 | 0.579 |                    |         |

**B. Tukeys's multiple comparisons test.**

| Receptor Comparison | Mean Difference $\pm$ SE | q     | Adjusted P Value |
|---------------------|--------------------------|-------|------------------|
| HS:FSAI vs. HS:FCVV | -0.774 $\pm$ 0.143       | 7.683 | <0.001           |
| HS:FSAI vs. HS:FCVI | -1.485 $\pm$ 0.143       | 14.75 | <0.001           |
| HS:FSAI vs. HS:FCAV | -1.541 $\pm$ 0.153       | 14.26 | <0.001           |
| HS:FSAI vs. HS:FSVV | -1.330 $\pm$ 0.155       | 12.17 | <0.001           |
| HS:FSAI vs. HS:FCAI | -1.686 $\pm$ 0.159       | 15.04 | <0.001           |
| HS:FSAI vs. HS:FSVI | -0.093 $\pm$ 0.151       | 0.870 | >0.999           |
| HS:FSAI vs. HS:FSAV | -1.873 $\pm$ 0.155       | 17.13 | <0.001           |
| HS:FSAI vs. LS:FSAI | -0.968 $\pm$ 0.104       | 13.21 | <0.001           |
| HS:FSAI vs. LS:FCVV | -1.512 $\pm$ 0.136       | 15.76 | <0.001           |
| HS:FSAI vs. LS:FCVI | -1.534 $\pm$ 0.139       | 15.62 | <0.001           |
| HS:FSAI vs. LS:FCAV | -1.511 $\pm$ 0.153       | 13.98 | <0.001           |
| HS:FSAI vs. LS:FSVV | -1.651 $\pm$ 0.139       | 16.81 | <0.001           |
| HS:FSAI vs. LS:FCAI | -1.703 $\pm$ 0.153       | 15.76 | <0.001           |
| HS:FSAI vs. LS:FSVI | -1.453 $\pm$ 0.136       | 15.15 | <0.001           |
| HS:FSAI vs. LS:FSAV | -1.579 $\pm$ 0.153       | 14.61 | <0.001           |
| HS:FCVV vs. HS:FCVI | -0.711 $\pm$ 0.170       | 5.917 | 0.003            |
| HS:FCVV vs. HS:FCAV | -0.767 $\pm$ 0.179       | 6.068 | 0.002            |
| HS:FCVV vs. HS:FSVV | -0.556 $\pm$ 0.180       | 4.363 | 0.138            |
| HS:FCVV vs. HS:FCAI | -0.912 $\pm$ 0.184       | 7.020 | <0.001           |
| HS:FCVV vs. HS:FSVI | 0.681 $\pm$ 0.177        | 5.430 | 0.013            |
| HS:FCVV vs. HS:FSAV | -1.099 $\pm$ 0.180       | 8.621 | <0.001           |
| HS:FCVV vs. LS:FSAI | -0.194 $\pm$ 0.139       | 1.972 | 0.991            |
| HS:FCVV vs. LS:FCVV | -0.738 $\pm$ 0.164       | 6.349 | <0.001           |
| HS:FCVV vs. LS:FCVI | -0.760 $\pm$ 0.167       | 6.430 | <0.001           |
| HS:FCVV vs. LS:FCAV | -0.737 $\pm$ 0.179       | 5.829 | 0.004            |
| HS:FCVV vs. LS:FSVV | -0.877 $\pm$ 0.167       | 7.427 | <0.001           |
| HS:FCVV vs. LS:FCAI | -0.929 $\pm$ 0.179       | 7.349 | <0.001           |
| HS:FCVV vs. LS:FSVI | -0.679 $\pm$ 0.164       | 5.845 | 0.004            |
| HS:FCVV vs. LS:FSAV | -0.805 $\pm$ 0.179       | 6.368 | <0.001           |
| HS:FCVI vs. HS:FCAV | -0.056 $\pm$ 0.179       | 0.442 | >0.999           |
| HS:FCVI vs. HS:FSVV | 0.155 $\pm$ 0.180        | 1.215 | >0.999           |

| <b>Table S11B cont.</b>    |                             |          |                         |
|----------------------------|-----------------------------|----------|-------------------------|
| <b>Receptor Comparison</b> | <b>Mean Difference ± SE</b> | <b>q</b> | <b>Adjusted P Value</b> |
| HS:FCVI vs. HS:FCAI        | -0.200 ± 0.184              | 1.542    | >0.999                  |
| HS:FCVI vs. HS:FSVI        | 1.392 ± 0.177               | 11.10    | <b>&lt;0.001</b>        |
| HS:FCVI vs. HS:FSAV        | -0.388 ± 0.180              | 3.043    | 0.731                   |
| HS:FCVI vs. LS:FSAI        | 0.517 ± 0.139               | 5.259    | 0.020                   |
| HS:FCVI vs. LS:FCVV        | -0.027 ± 0.164              | 0.229    | >0.999                  |
| HS:FCVI vs. LS:FCVI        | -0.048 ± 0.167              | 0.407    | >0.999                  |
| HS:FCVI vs. LS:FCAV        | -0.026 ± 0.179              | 0.203    | >0.999                  |
| HS:FCVI vs. LS:FSVV        | -0.166 ± 0.167              | 1.404    | >0.999                  |
| HS:FCVI vs. LS:FCAI        | -0.218 ± 0.179              | 1.722    | 0.998                   |
| HS:FCVI vs. LS:FSVI        | 0.032 ± 0.164               | 0.275    | >0.999                  |
| HS:FCVI vs. LS:FSAV        | -0.094 ± 0.179              | 0.742    | >0.999                  |
| HS:FCAV vs. HS:FSVV        | 0.211 ± 0.189               | 1.581    | >0.999                  |
| HS:FCAV vs. HS:FCAI        | -0.144 ± 0.192              | 1.064    | >0.999                  |
| HS:FCAV vs. HS:FSVI        | 1.448 ± 0.186               | 11.02    | <b>&lt;0.001</b>        |
| HS:FCAV vs. HS:FSAV        | -0.332 ± 0.189              | 2.490    | 0.929                   |
| HS:FCAV vs. LS:FSAI        | 0.573 ± 0.150               | 5.415    | <b>0.013</b>            |
| HS:FCAV vs. LS:FCVV        | 0.029 ± 0.174               | 0.239    | >0.999                  |
| HS:FCAV vs. LS:FCVI        | 0.008 ± 0.176               | 0.063    | >0.999                  |
| HS:FCAV vs. LS:FCAV        | 0.030 ± 0.187               | 0.229    | >0.999                  |
| HS:FCAV vs. LS:FSVV        | -0.110 ± 0.176              | 0.883    | >0.999                  |
| HS:FCAV vs. LS:FCAI        | -0.162 ± 0.187              | 1.223    | >0.999                  |
| HS:FCAV vs. LS:FSVI        | 0.088 ± 0.174               | 0.717    | >0.999                  |
| HS:FCAV vs. LS:FSAV        | -0.038 ± 0.187              | 0.286    | >0.999                  |
| HS:FSVV vs. HS:FCAI        | -0.355 ± 0.193              | 2.599    | 0.902                   |
| HS:FSVV vs. HS:FSVI        | 1.237 ± 0.187               | 9.344    | <b>&lt;0.001</b>        |
| HS:FSVV vs. HS:FSAV        | -0.543 ± 0.190              | 4.040    | 0.240                   |
| HS:FSVV vs. LS:FSAI        | 0.362 ± 0.152               | 3.382    | 0.555                   |
| HS:FSVV vs. LS:FCVV        | -0.182 ± 0.175              | 1.467    | >0.999                  |
| HS:FSVV vs. LS:FCVI        | -0.203 ± 0.178              | 1.618    | 0.999                   |
| HS:FSVV vs. LS:FCAV        | -0.181 ± 0.189              | 1.354    | >0.999                  |
| HS:FSVV vs. LS:FSVV        | -0.321 ± 0.178              | 2.556    | 0.914                   |
| HS:FSVV vs. LS:FCAI        | -0.373 ± 0.189              | 2.795    | 0.838                   |
| HS:FSVV vs. LS:FSVI        | -0.123 ± 0.175              | 0.994    | >0.999                  |
| HS:FSVV vs. LS:FSAV        | -0.249 ± 0.189              | 1.865    | 0.995                   |
| HS:FCAI vs. HS:FSVI        | 1.593 ± 0.191               | 11.82    | <b>&lt;0.001</b>        |
| HS:FCAI vs. HS:FSAV        | -0.188 ± 0.193              | 1.374    | 0.999                   |
| HS:FCAI vs. LS:FSAI        | 0.718 ± 0.156               | 6.527    | <b>&lt;0.001</b>        |
| HS:FCAI vs. LS:FCVV        | 0.174 ± 0.178               | 1.376    | 0.999                   |
| HS:FCAI vs. LS:FCVI        | 0.152 ± 0.181               | 1.189    | >0.999                  |
| HS:FCAI vs. LS:FCAV        | 0.175 ± 0.192               | 1.287    | >0.999                  |
| HS:FCAI vs. LS:FSVV        | 0.034 ± 0.181               | 0.269    | >0.999                  |
| HS:FCAI vs. LS:FCAI        | -0.018 ± 0.192              | 0.130    | >0.999                  |
| HS:FCAI vs. LS:FSVI        | 0.232 ± 0.178               | 1.840    | 0.996                   |
| HS:FCAI vs. LS:FSAV        | 0.106 ± 0.192               | 0.784    | >0.999                  |
| HS:FSVI vs. HS:FSAV        | -1.780 ± 0.187              | 13.44    | <b>&lt;0.001</b>        |
| HS:FSVI vs. LS:FSAI        | -0.875 ± 0.148              | 8.361    | <b>&lt;0.001</b>        |
| HS:FSVI vs. LS:FCVV        | -1.419 ± 0.172              | 11.67    | <b>&lt;0.001</b>        |

| <b>Table S11B cont.</b>    |                             |          |                         |
|----------------------------|-----------------------------|----------|-------------------------|
| <b>Receptor Comparison</b> | <b>Mean Difference ± SE</b> | <b>q</b> | <b>Adjusted P Value</b> |
| HS:FSVI vs. LS:FCVI        | -1.441 ± 0.175              | 11.67    | <0.001                  |
| HS:FSVI vs. LS:FCAV        | -1.418 ± 0.186              | 10.79    | <0.001                  |
| HS:FSVI vs. LS:FSVV        | -1.558 ± 0.175              | 12.63    | <0.001                  |
| HS:FSVI vs. LS:FCAI        | -1.610 ± 0.186              | 12.25    | <0.001                  |
| HS:FSVI vs. LS:FSVI        | -1.360 ± 0.172              | 11.19    | <0.001                  |
| HS:FSVI vs. LS:FSAV        | -1.486 ± 0.186              | 11.31    | <0.001                  |
| HS:FSAV vs. LS:FSAI        | 0.905 ± 0.152               | 8.449    | <0.001                  |
| HS:FSAV vs. LS:FCVV        | 0.361 ± 0.175               | 2.920    | 0.787                   |
| HS:FSAV vs. LS:FCVI        | 0.340 ± 0.178               | 2.708    | 0.869                   |
| HS:FSAV vs. LS:FCAV        | 0.362 ± 0.189               | 2.717    | 0.866                   |
| HS:FSAV vs. LS:FSVV        | 0.222 ± 0.178               | 1.770    | 0.997                   |
| HS:FSAV vs. LS:FCAI        | 0.170 ± 0.189               | 1.276    | >0.999                  |
| HS:FSAV vs. LS:FSVI        | 0.420 ± 0.175               | 3.393    | 0.549                   |
| HS:FSAV vs. LS:FSAV        | 0.294 ± 0.189               | 2.205    | 0.977                   |
| LS:FSAI vs. LS:FCVV        | -0.544 ± 0.132              | 5.821    | 0.004                   |
| LS:FSAI vs. LS:FCVI        | -0.566 ± 0.136              | 5.904    | 0.004                   |
| LS:FSAI vs. LS:FCAV        | -0.543 ± 0.150              | 5.128    | 0.027                   |
| LS:FSAI vs. LS:FSVV        | -0.683 ± 0.136              | 7.133    | <0.001                  |
| LS:FSAI vs. LS:FCAI        | -0.735 ± 0.150              | 6.944    | <0.001                  |
| LS:FSAI vs. LS:FSVI        | -0.485 ± 0.132              | 5.194    | 0.023                   |
| LS:FSAI vs. LS:FSAV        | -0.611 ± 0.150              | 5.773    | 0.005                   |
| LS:FCVV vs. LS:FCVI        | -0.022 ± 0.161              | 0.189    | >0.999                  |
| LS:FCVV vs. LS:FCAV        | 0.001 ± 0.174               | 0.008    | >0.999                  |
| LS:FCVV vs. LS:FSVV        | -0.139 ± 0.161              | 1.220    | >0.999                  |
| LS:FCVV vs. LS:FCAI        | -0.191 ± 0.172              | 1.559    | >0.999                  |
| LS:FCVV vs. LS:FSVI        | 0.059 ± 0.159               | 0.523    | >0.999                  |
| LS:FCVV vs. LS:FSAV        | -0.067 ± 0.174              | 0.548    | >0.999                  |
| LS:FCVI vs. LS:FCAV        | 0.023 ± 0.176               | 0.181    | >0.999                  |
| LS:FCVI vs. LS:FSVV        | -0.118 ± 0.164              | 1.015    | >0.999                  |
| LS:FCVI vs. LS:FCAI        | -0.170 ± 0.176              | 1.364    | >0.999                  |
| LS:FCVI vs. LS:FSVI        | 0.080 ± 0.161               | 0.702    | >0.999                  |
| LS:FCVI vs. LS:FSAV        | -0.046 ± 0.176              | 0.367    | >0.999                  |
| LS:FCAV vs. LS:FSVV        | -0.140 ± 0.176              | 1.127    | >0.999                  |
| LS:FCAV vs. LS:FCAI        | -0.192 ± 0.187              | 1.452    | 0.997                   |
| LS:FCAV vs. LS:FSVI        | 0.058 ± 0.174               | 0.470    | >0.999                  |
| LS:FCAV vs. LS:FSAV        | -0.068 ± 0.187              | 0.515    | >0.999                  |
| LS:FSVV vs. LS:FCAI        | -0.052 ± 0.176              | 0.418    | >0.999                  |
| LS:FSVV vs. LS:FSVI        | 0.198 ± 0.161               | 1.734    | 0.998                   |
| LS:FSVV vs. LS:FSAV        | 0.072 ± 0.176               | 0.579    | >0.999                  |
| LS:FCAI vs. LS:FSVI        | 0.250 ± 0.174               | 2.037    | 0.988                   |
| LS:FCAI vs. LS:FSAV        | 0.124 ± 0.187               | 0.937    | >0.999                  |
| LS:FSVI vs. LS:FSAV        | -0.129 ± 0.174              | 1.026    | >0.999                  |

**Table S12. Statistical comparisons of the effect of receptor stoichiometry and genotype on response to epibatidine (maximal current) of Human-to-*Ameerega* mutated nAChRs. HS: high sensitivity (1:7 ratio); LS: low sensitivity (7:1 ratio).**

**A. Two-way ANOVA**

| Source of Variation       | % of total variation | SS (Type III) | DF  | MS      | F (DFn, DFd)       | P value |
|---------------------------|----------------------|---------------|-----|---------|--------------------|---------|
| Interaction               | 14.11                | 5539626       | 7   | 791375  | F (7, 719) = 25.58 | <0.001  |
| Stoichiometry (HS vs. LS) | 13.37                | 5248866       | 1   | 5248866 | F (1, 719) = 169.7 | <0.001  |
| Receptor Genotype         | 15.83                | 6214085       | 7   | 887726  | F (7, 719) = 28.69 | <0.001  |
| Residual                  |                      | 22244317      | 719 | 30938   |                    |         |

**B. Tukey's multiple comparisons test.**

| Receptor Comparison | Mean Difference ± SE | q     | Adjusted P Value |
|---------------------|----------------------|-------|------------------|
| HS:FSAI vs. HS:FCVV | 9.710 ± 32.95        | 0.417 | >0.999           |
| HS:FSAI vs. HS:FCVI | -53.04 ± 32.95       | 2.276 | 0.967            |
| HS:FSAI vs. HS:FCAV | -32.84 ± 35.36       | 1.314 | >0.999           |
| HS:FSAI vs. HS:FSVV | -207.6 ± 35.77       | 8.210 | <0.001           |
| HS:FSAI vs. HS:FCAI | -65.34 ± 36.66       | 2.521 | 0.922            |
| HS:FSAI vs. HS:FSVI | 0.720 ± 34.96        | 0.029 | >0.999           |
| HS:FSAI vs. HS:FSAV | -112.7 ± 35.77       | 4.458 | 0.116            |
| HS:FSAI vs. LS:FSAI | -345.7 ± 23.97       | 20.40 | <0.001           |
| HS:FSAI vs. LS:FCVV | -78.24 ± 31.39       | 3.525 | 0.478            |
| HS:FSAI vs. LS:FCVI | -106.8 ± 32.12       | 4.703 | 0.071            |
| HS:FSAI vs. LS:FCAV | -82.94 ± 35.36       | 3.318 | 0.589            |
| HS:FSAI vs. LS:FSVV | -386.9 ± 32.12       | 17.03 | <0.001           |
| HS:FSAI vs. LS:FCAI | -79.44 ± 35.36       | 3.178 | 0.663            |
| HS:FSAI vs. LS:FSVI | -604.5 ± 31.39       | 27.24 | <0.001           |
| HS:FSAI vs. LS:FSAV | -234.5 ± 35.36       | 9.382 | <0.001           |
| HS:FCVV vs. HS:FCVI | -62.75 ± 39.33       | 2.256 | 0.969            |
| HS:FCVV vs. HS:FCAV | -42.55 ± 41.36       | 1.455 | >0.999           |
| HS:FCVV vs. HS:FSVV | -217.4 ± 41.72       | 7.368 | <0.001           |
| HS:FCVV vs. HS:FCAI | -75.05 ± 42.48       | 2.498 | 0.927            |
| HS:FCVV vs. HS:FSVI | -8.990 ± 41.03       | 0.310 | >0.999           |
| HS:FCVV vs. HS:FSAV | -122.5 ± 41.72       | 4.151 | 0.200            |
| HS:FCVV vs. LS:FSAI | -355.5 ± 32.18       | 15.62 | <0.001           |
| HS:FCVV vs. LS:FCVV | -87.95 ± 38.03       | 3.271 | 0.614            |
| HS:FCVV vs. LS:FCVI | -116.6 ± 38.64       | 4.266 | 0.165            |
| HS:FCVV vs. LS:FCAV | -92.65 ± 41.36       | 3.168 | 0.668            |
| HS:FCVV vs. LS:FSVV | -396.7 ± 38.64       | 14.52 | <0.001           |
| HS:FCVV vs. LS:FCAI | -89.15 ± 41.36       | 3.048 | 0.728            |
| HS:FCVV vs. LS:FSVI | -614.3 ± 38.03       | 22.84 | <0.001           |
| HS:FCVV vs. LS:FSAV | -244.3 ± 41.36       | 8.351 | <0.001           |
| HS:FCVI vs. HS:FCAV | 20.20 ± 41.36        | 0.691 | >0.999           |

| <b>Table S12B cont.</b>    |                             |          |                         |
|----------------------------|-----------------------------|----------|-------------------------|
| <b>Receptor Comparison</b> | <b>Mean Difference ± SE</b> | <b>q</b> | <b>Adjusted P Value</b> |
| HS:FCVI vs. HS:FSV         | -154.6 ± 41.72              | 5.241    | <b>0.021</b>            |
| HS:FCVI vs. HS:FCAI        | -12.30 ± 42.48              | 0.410    | >0.999                  |
| HS:FCVI vs. HS:FSVI        | 53.76 ± 41.03               | 1.853    | 0.996                   |
| HS:FCVI vs. HS:FSAV        | -59.70 ± 41.72              | 2.024    | 0.989                   |
| HS:FCVI vs. LS:FSAI        | -292.7 ± 32.18              | 12.86    | <b>&lt;0.001</b>        |
| HS:FCVI vs. LS:FCVV        | -25.20 ± 38.03              | 0.937    | >0.999                  |
| HS:FCVI vs. LS:FCVI        | -53.80 ± 38.64              | 1.969    | 0.992                   |
| HS:FCVI vs. LS:FCAV        | -29.90 ± 41.36              | 1.022    | >0.999                  |
| HS:FCVI vs. LS:FSV         | -333.9 ± 38.64              | 12.22    | <b>&lt;0.001</b>        |
| HS:FCVI vs. LS:FCAI        | -26.40 ± 41.36              | 0.903    | >0.999                  |
| HS:FCVI vs. LS:FSVI        | -551.5 ± 38.03              | 20.51    | <b>&lt;0.001</b>        |
| HS:FCVI vs. LS:FSAV        | -181.5 ± 41.36              | 6.205    | <b>0.001</b>            |
| HS:FCAV vs. HS:FSV         | -174.8 ± 43.64              | 5.665    | <b>0.007</b>            |
| HS:FCAV vs. HS:FCAI        | -32.50 ± 44.37              | 1.036    | >0.999                  |
| HS:FCAV vs. HS:FSVI        | 33.56 ± 42.98               | 1.104    | >0.999                  |
| HS:FCAV vs. HS:FSAV        | -79.90 ± 43.64              | 2.589    | 0.905                   |
| HS:FCAV vs. LS:FSAI        | -312.9 ± 34.64              | 12.78    | <b>&lt;0.001</b>        |
| HS:FCAV vs. LS:FCVV        | -45.40 ± 40.13              | 1.600    | 0.999                   |
| HS:FCAV vs. LS:FCVI        | -74.00 ± 40.71              | 2.571    | 0.910                   |
| HS:FCAV vs. LS:FCAV        | -50.10 ± 43.30              | 1.636    | 0.999                   |
| HS:FCAV vs. LS:FSV         | -354.1 ± 40.71              | 12.30    | <b>&lt;0.001</b>        |
| HS:FCAV vs. LS:FCAI        | -46.60 ± 43.30              | 1.522    | >0.999                  |
| HS:FCAV vs. LS:FSVI        | -571.7 ± 40.13              | 20.15    | <b>&lt;0.001</b>        |
| HS:FCAV vs. LS:FSAV        | -201.7 ± 43.30              | 6.587    | <b>&lt;0.001</b>        |
| HS:FSV vs. HS:FCAI         | 142.3 ± 44.70               | 4.502    | 0.106                   |
| HS:FSV vs. HS:FSVI         | 208.4 ± 43.32               | 6.802    | <b>&lt;0.001</b>        |
| HS:FSV vs. HS:FSAV         | 94.90 ± 43.97               | 3.052    | 0.726                   |
| HS:FSV vs. LS:FSAI         | -138.1 ± 35.06              | 5.571    | <b>0.009</b>            |
| HS:FSV vs. LS:FCVV         | 129.4 ± 40.49               | 4.520    | 0.103                   |
| HS:FSV vs. LS:FCVI         | 100.8 ± 41.06               | 3.471    | 0.507                   |
| HS:FSV vs. LS:FCAV         | 124.7 ± 43.64               | 4.041    | 0.239                   |
| HS:FSV vs. LS:FSV          | -179.3 ± 41.06              | 6.175    | <b>0.002</b>            |
| HS:FSV vs. LS:FCAI         | 128.2 ± 43.64               | 4.155    | 0.199                   |
| HS:FSV vs. LS:FSVI         | -396.9 ± 40.49              | 13.86    | <b>&lt;0.001</b>        |
| HS:FSV vs. LS:FSAV         | -26.90 ± 43.64              | 0.872    | >0.999                  |
| HS:FCAI vs. HS:FSVI        | 66.06 ± 44.06               | 2.120    | 0.983                   |
| HS:FCAI vs. HS:FSAV        | -47.40 ± 44.70              | 1.500    | >0.999                  |
| HS:FCAI vs. LS:FSAI        | -280.4 ± 35.96              | 11.03    | <b>&lt;0.001</b>        |
| HS:FCAI vs. LS:FCVV        | -12.90 ± 41.28              | 0.442    | >0.999                  |
| HS:FCAI vs. LS:FCVI        | -41.50 ± 41.84              | 1.403    | >0.999                  |
| HS:FCAI vs. LS:FCAV        | -17.60 ± 44.37              | 0.561    | >0.999                  |
| HS:FCAI vs. LS:FSV         | -321.6 ± 41.84              | 10.87    | <b>&lt;0.001</b>        |
| HS:FCAI vs. LS:FCAI        | -14.10 ± 44.37              | 0.449    | >0.999                  |
| HS:FCAI vs. LS:FSVI        | -539.2 ± 41.28              | 18.47    | <b>&lt;0.001</b>        |
| HS:FCAI vs. LS:FSAV        | -169.2 ± 44.37              | 5.393    | <b>0.014</b>            |

| <b>Table S12B cont.</b>    |                             |          |                         |
|----------------------------|-----------------------------|----------|-------------------------|
| <b>Receptor Comparison</b> | <b>Mean Difference ± SE</b> | <b>q</b> | <b>Adjusted P Value</b> |
| HS:FSVI vs. HS:FSAV        | -113.5 ± 43.32              | 3.704    | 0.387                   |
| HS:FSVI vs. LS:FSAI        | -346.5 ± 34.24              | 14.31    | <b>&lt;0.001</b>        |
| HS:FSVI vs. LS:FCVV        | -78.96 ± 39.78              | 2.807    | 0.833                   |
| HS:FSVI vs. LS:FCVI        | -107.6 ± 40.37              | 3.768    | 0.356                   |
| HS:FSVI vs. LS:FCAV        | -83.66 ± 42.98              | 2.753    | 0.853                   |
| HS:FSVI vs. LS:FSVV        | -387.7 ± 40.37              | 13.58    | <b>&lt;0.001</b>        |
| HS:FSVI vs. LS:FCAI        | -80.16 ± 42.98              | 2.637    | 0.891                   |
| HS:FSVI vs. LS:FSVI        | -605.3 ± 39.78              | 21.52    | <b>&lt;0.001</b>        |
| HS:FSVI vs. LS:FSAV        | -235.3 ± 42.98              | 7.741    | <b>&lt;0.001</b>        |
| HS:FSAV vs. LS:FSAI        | -233.0 ± 35.06              | 9.399    | <b>&lt;0.001</b>        |
| HS:FSAV vs. LS:FCVV        | 34.50 ± 40.49               | 1.205    | >0.999                  |
| HS:FSAV vs. LS:FCVI        | 5.900 ± 41.06               | 0.203    | >0.999                  |
| HS:FSAV vs. LS:FCAV        | 29.80 ± 43.64               | 0.967    | >0.999                  |
| HS:FSAV vs. LS:FSVV        | -274.2 ± 41.06              | 9.443    | <b>&lt;0.001</b>        |
| HS:FSAV vs. LS:FCAI        | 33.30 ± 43.64               | 1.079    | >0.999                  |
| HS:FSAV vs. LS:FSVI        | -491.8 ± 40.49              | 17.18    | <b>&lt;0.001</b>        |
| HS:FSAV vs. LS:FSAV        | -121.8 ± 43.64              | 3.947    | 0.277                   |
| LS:FSAI vs. LS:FCVV        | 267.5 ± 30.57               | 12.37    | <b>&lt;0.001</b>        |
| LS:FSAI vs. LS:FCVI        | 238.9 ± 31.33               | 10.78    | <b>&lt;0.001</b>        |
| LS:FSAI vs. LS:FCAV        | 262.8 ± 34.64               | 10.73    | <b>&lt;0.001</b>        |
| LS:FSAI vs. LS:FSVV        | -41.20 ± 31.33              | 1.860    | 0.995                   |
| LS:FSAI vs. LS:FCAI        | 266.3 ± 34.64               | 10.87    | <b>&lt;0.001</b>        |
| LS:FSAI vs. LS:FSVI        | -258.8 ± 30.57              | 11.97    | <b>&lt;0.001</b>        |
| LS:FSAI vs. LS:FSAV        | 111.2 ± 34.64               | 4.540    | 0.098                   |
| LS:FCVV vs. LS:FCVI        | -28.60 ± 37.31              | 1.084    | >0.999                  |
| LS:FCVV vs. LS:FCAV        | -4.700 ± 40.13              | 0.166    | >0.999                  |
| LS:FCVV vs. LS:FSVV        | -308.7 ± 37.31              | 11.70    | <b>&lt;0.001</b>        |
| LS:FCVV vs. LS:FCAI        | -1.200 ± 40.13              | 0.043    | >0.999                  |
| LS:FCVV vs. LS:FSVI        | -526.3 ± 36.68              | 20.29    | <b>&lt;0.001</b>        |
| LS:FCVV vs. LS:FSAV        | -156.3 ± 40.13              | 5.509    | <b>0.010</b>            |
| LS:FCVI vs. LS:FCAV        | 23.90 ± 40.71               | 0.830    | >0.999                  |
| LS:FCVI vs. LS:FSVV        | -280.1 ± 37.93              | 10.44    | <b>&lt;0.001</b>        |
| LS:FCVI vs. LS:FCAI        | 27.40 ± 40.71               | 0.952    | >0.999                  |
| LS:FCVI vs. LS:FSVI        | -497.7 ± 37.31              | 18.86    | <b>&lt;0.001</b>        |
| LS:FCVI vs. LS:FSAV        | -127.7 ± 40.71              | 4.437    | 0.120                   |
| LS:FCAV vs. LS:FSVV        | -304.0 ± 40.71              | 10.56    | <b>&lt;0.001</b>        |
| LS:FCAV vs. LS:FCAI        | 3.500 ± 43.30               | 0.114    | >0.999                  |
| LS:FCAV vs. LS:FSVI        | -521.6 ± 40.13              | 18.38    | <b>&lt;0.001</b>        |
| LS:FCAV vs. LS:FSAV        | -151.6 ± 43.30              | 4.951    | <b>0.041</b>            |
| LS:FSVV vs. LS:FCAI        | 307.5 ± 40.71               | 10.68    | <b>&lt;0.001</b>        |
| LS:FSVV vs. LS:FSVI        | -217.6 ± 37.31              | 8.248    | <b>&lt;0.001</b>        |
| LS:FSVV vs. LS:FSAV        | 152.4 ± 40.71               | 5.295    | <b>0.018</b>            |
| LS:FCAI vs. LS:FSVI        | -525.1 ± 40.13              | 18.51    | <b>&lt;0.001</b>        |
| LS:FCAI vs. LS:FSAV        | -155.1 ± 43.30              | 5.066    | <b>0.031</b>            |
| LS:FSVI vs. LS:FSAV        | 370.0 ± 40.13               | 13.04    | <b>&lt;0.001</b>        |



**Table S13. Statistical comparisons of the effect of receptor stoichiometry and genotype on response to ACh ( $\log EC_{50}$ ) of *Epipedobates-to-Human* mutated nAChRs. HS: high sensitivity (1:7 ratio); LS: low sensitivity (7:1 ratio).**

**A. Two-way ANOVA**

| Source of Variation       | % of total variation | SS (Type III) | DF  | MS    | F (DFn, DFd)       | P value |
|---------------------------|----------------------|---------------|-----|-------|--------------------|---------|
| Interaction               | 0.641                | 0.336         | 3   | 0.112 | F (3, 385) = 0.906 | 0.438   |
| Stoichiometry (HS vs. LS) | 0.087                | 0.046         | 1   | 0.046 | F (1, 385) = 0.368 | 0.544   |
| Receptor Genotype         | 8.464                | 4.437         | 3   | 1.479 | F (3, 385) = 11.96 | <0.001  |
| Residual                  |                      | 47.60         | 385 | 0.124 |                    |         |

**B. Tukey's multiple comparisons test.**

| Receptor Comparison | Mean Difference $\pm$ SE | q     | Adjusted P Value |
|---------------------|--------------------------|-------|------------------|
| HS:FSAI vs. HS:LCAI | 0.012 $\pm$ 0.069        | 0.244 | >0.999           |
| HS:FSAI vs. HS:FCAI | -0.302 $\pm$ 0.080       | 5.338 | <b>0.005</b>     |
| HS:FSAI vs. HS:LSAI | -0.068 $\pm$ 0.081       | 1.173 | 0.991            |
| HS:FSAI vs. LS:FSAI | -0.122 $\pm$ 0.078       | 2.205 | 0.774            |
| HS:FSAI vs. LS:LCAI | -0.014 $\pm$ 0.065       | 0.305 | >0.999           |
| HS:FSAI vs. LS:FCAI | -0.280 $\pm$ 0.075       | 5.246 | <b>0.006</b>     |
| HS:FSAI vs. LS:LSAI | -0.032 $\pm$ 0.079       | 0.570 | >0.999           |
| HS:LCAI vs. HS:FCAI | -0.314 $\pm$ 0.073       | 6.085 | <b>&lt;0.001</b> |
| HS:LCAI vs. HS:LSAI | -0.079 $\pm$ 0.074       | 1.511 | 0.963            |
| HS:LCAI vs. LS:FSAI | -0.134 $\pm$ 0.071       | 2.666 | 0.562            |
| HS:LCAI vs. LS:LCAI | -0.026 $\pm$ 0.057       | 0.652 | >0.999           |
| HS:LCAI vs. LS:FCAI | -0.292 $\pm$ 0.068       | 6.072 | <b>&lt;0.001</b> |
| HS:LCAI vs. LS:LSAI | -0.044 $\pm$ 0.072       | 0.863 | 0.999            |
| HS:FCAI vs. HS:LSAI | 0.234 $\pm$ 0.084        | 3.938 | 0.102            |
| HS:FCAI vs. LS:FSAI | 0.180 $\pm$ 0.081        | 3.125 | 0.348            |
| HS:FCAI vs. LS:LCAI | 0.287 $\pm$ 0.069        | 5.888 | <b>0.001</b>     |
| HS:FCAI vs. LS:FCAI | 0.022 $\pm$ 0.079        | 0.389 | >0.999           |
| HS:FCAI vs. LS:LSAI | 0.270 $\pm$ 0.082        | 4.665 | <b>0.023</b>     |
| HS:LSAI vs. LS:FSAI | -0.055 $\pm$ 0.083       | 0.934 | 0.998            |
| HS:LSAI vs. LS:LCAI | 0.053 $\pm$ 0.071        | 1.068 | 0.995            |
| HS:LSAI vs. LS:FCAI | -0.213 $\pm$ 0.080       | 3.762 | 0.138            |
| HS:LSAI vs. LS:LSAI | 0.036 $\pm$ 0.083        | 0.607 | >0.999           |
| LS:FSAI vs. LS:LCAI | 0.108 $\pm$ 0.067        | 2.273 | 0.746            |
| LS:FSAI vs. LS:FCAI | -0.158 $\pm$ 0.077       | 2.904 | 0.448            |
| LS:FSAI vs. LS:LSAI | 0.090 $\pm$ 0.080        | 1.592 | 0.951            |
| LS:LCAI vs. LS:FCAI | -0.266 $\pm$ 0.064       | 5.886 | <b>0.001</b>     |
| LS:LCAI vs. LS:LSAI | -0.018 $\pm$ 0.068       | 0.368 | >0.999           |
| LS:FCAI vs. LS:LSAI | 0.248 $\pm$ 0.077        | 4.530 | <b>0.032</b>     |

**Table S14. Statistical comparisons of the effect of receptor stoichiometry and genotype on response to epibatidine ( $\log EC_{50}$ ) of *Epipedobates*-to-Human mutated nAChRs. HS: high sensitivity (1:7 ratio); LS: low sensitivity (7:1 ratio).**

**A. Two-way ANOVA**

| Source of Variation       | % of total variation | SS (Type III) | DF  | MS    | F (DFn, DFd)       | P value |
|---------------------------|----------------------|---------------|-----|-------|--------------------|---------|
| Interaction               | 0.024                | 0.262         | 3   | 0.087 | F (3, 270) = 0.098 | 0.961   |
| Stoichiometry (HS vs. LS) | 59.61                | 651.2         | 1   | 651.2 | F (1, 270) = 726.6 | <0.001  |
| Receptor Genotype         | 18.22                | 199.0         | 3   | 66.35 | F (3, 270) = 74.03 | <0.001  |
| Residual                  |                      | 242.0         | 270 | 0.896 |                    |         |

**B. Tukey's multiple comparisons test.**

| Receptor Comparison | Mean Difference $\pm$ SE | q     | Adjusted P Value |
|---------------------|--------------------------|-------|------------------|
| HS:FSAI vs. HS:LCAI | -1.638 $\pm$ 0.241       | 9.597 | <0.001           |
| HS:FSAI vs. HS:FCAI | -2.134 $\pm$ 0.258       | 11.68 | <0.001           |
| HS:FSAI vs. HS:LSAI | -0.246 $\pm$ 0.277       | 1.257 | 0.987            |
| HS:FSAI vs. LS:FSAI | -3.311 $\pm$ 0.237       | 19.75 | <0.001           |
| HS:FSAI vs. LS:LCAI | -4.864 $\pm$ 0.232       | 29.66 | <0.001           |
| HS:FSAI vs. LS:FCAI | -5.287 $\pm$ 0.274       | 27.34 | <0.001           |
| HS:FSAI vs. LS:LSAI | -3.401 $\pm$ 0.236       | 20.37 | <0.001           |
| HS:LCAI vs. HS:FCAI | -0.496 $\pm$ 0.231       | 3.038 | 0.387            |
| HS:LCAI vs. HS:LSAI | 1.392 $\pm$ 0.251        | 7.834 | <0.001           |
| HS:LCAI vs. LS:FSAI | -1.673 $\pm$ 0.207       | 11.44 | <0.001           |
| HS:LCAI vs. LS:LCAI | -3.226 $\pm$ 0.201       | 22.72 | <0.001           |
| HS:LCAI vs. LS:FCAI | -3.649 $\pm$ 0.248       | 20.83 | <0.001           |
| HS:LCAI vs. LS:LSAI | -1.763 $\pm$ 0.206       | 12.12 | <0.001           |
| HS:FCAI vs. HS:LSAI | 1.888 $\pm$ 0.268        | 9.975 | <0.001           |
| HS:FCAI vs. LS:FSAI | -1.177 $\pm$ 0.226       | 7.348 | <0.001           |
| HS:FCAI vs. LS:LCAI | -2.730 $\pm$ 0.221       | 17.47 | <0.001           |
| HS:FCAI vs. LS:FCAI | -3.153 $\pm$ 0.264       | 16.87 | <0.001           |
| HS:FCAI vs. LS:LSAI | -1.267 $\pm$ 0.225       | 7.950 | <0.001           |
| HS:LSAI vs. LS:FSAI | -3.065 $\pm$ 0.247       | 17.53 | <0.001           |
| HS:LSAI vs. LS:LCAI | -4.618 $\pm$ 0.242       | 26.96 | <0.001           |
| HS:LSAI vs. LS:FCAI | -5.041 $\pm$ 0.282       | 25.25 | <0.001           |
| HS:LSAI vs. LS:LSAI | -3.155 $\pm$ 0.246       | 18.12 | <0.001           |
| LS:FSAI vs. LS:LCAI | -1.554 $\pm$ 0.196       | 11.23 | <0.001           |
| LS:FSAI vs. LS:FCAI | -1.977 $\pm$ 0.244       | 11.47 | <0.001           |
| LS:FSAI vs. LS:LSAI | -0.091 $\pm$ 0.201       | 0.639 | >0.999           |
| LS:LCAI vs. LS:FCAI | -0.423 $\pm$ 0.239       | 2.508 | 0.637            |
| LS:LCAI vs. LS:LSAI | 1.463 $\pm$ 0.195        | 10.63 | <0.001           |
| LS:FCAI vs. LS:LSAI | 1.886 $\pm$ 0.243        | 10.99 | <0.001           |

**Table S15. Statistical comparisons of the effect of receptor stoichiometry and genotype on response to epibatidine (maximal current expressed as percentage of ACh maximal current) of *Epipedobates*-to-Human mutated nAChRs. HS: high sensitivity (1:7 ratio); LS: low sensitivity (7:1 ratio).**

**A. Two-way ANOVA**

| Source of Variation       | % of total variation | SS (Type III) | DF  | MS    | F (DFn, DFd)       | P value |
|---------------------------|----------------------|---------------|-----|-------|--------------------|---------|
| Interaction               | 6.313                | 73640         | 3   | 24547 | F (3, 270) = 6.849 | <0.001  |
| Stoichiometry (HS vs. LS) | 5.350                | 62402         | 1   | 62402 | F (1, 270) = 17.41 | <0.001  |
| Receptor Genotype         | 5.382                | 62780         | 3   | 20927 | F (3, 270) = 5.839 | <0.001  |
| Residual                  |                      | 967634        | 270 | 3584  |                    |         |

**B. Tukey's multiple comparisons test.**

| Receptor Comparison | Mean Difference $\pm$ SE | <i>q</i> | Adjusted P Value |
|---------------------|--------------------------|----------|------------------|
| HS:FSAI vs. HS:LCAI | 39.65 $\pm$ 15.26        | 3.674    | 0.161            |
| HS:FSAI vs. HS:FCAI | 40.25 $\pm$ 16.34        | 3.484    | 0.216            |
| HS:FSAI vs. HS:LSAI | 15.14 $\pm$ 17.50        | 1.223    | 0.989            |
| HS:FSAI vs. LS:FSAI | 20.16 $\pm$ 14.99        | 1.902    | 0.881            |
| HS:FSAI vs. LS:LCAI | -24.60 $\pm$ 14.66       | 2.372    | 0.702            |
| HS:FSAI vs. LS:FCAI | 18.78 $\pm$ 17.30        | 1.536    | 0.959            |
| HS:FSAI vs. LS:LSAI | -45.04 $\pm$ 14.93       | 4.265    | 0.056            |
| HS:LCAI vs. HS:FCAI | 0.600 $\pm$ 14.60        | 0.058    | >0.999           |
| HS:LCAI vs. HS:LSAI | -24.51 $\pm$ 15.89       | 2.181    | 0.784            |
| HS:LCAI vs. LS:FSAI | -19.49 $\pm$ 13.08       | 2.108    | 0.812            |
| HS:LCAI vs. LS:LCAI | -64.25 $\pm$ 12.70       | 7.155    | <b>&lt;0.001</b> |
| HS:LCAI vs. LS:FCAI | -20.87 $\pm$ 15.67       | 1.884    | 0.886            |
| HS:LCAI vs. LS:LSAI | -84.69 $\pm$ 13.01       | 9.207    | <b>&lt;0.001</b> |
| HS:FCAI vs. HS:LSAI | -25.11 $\pm$ 16.93       | 2.098    | 0.816            |
| HS:FCAI vs. LS:FSAI | -20.09 $\pm$ 14.32       | 1.984    | 0.855            |
| HS:FCAI vs. LS:LCAI | -64.85 $\pm$ 13.97       | 6.563    | <b>0.001</b>     |
| HS:FCAI vs. LS:FCAI | -21.47 $\pm$ 16.72       | 1.816    | 0.904            |
| HS:FCAI vs. LS:LSAI | -85.29 $\pm$ 14.26       | 8.461    | <b>&lt;0.001</b> |
| HS:LSAI vs. LS:FSAI | 5.020 $\pm$ 15.63        | 0.454    | >0.999           |
| HS:LSAI vs. LS:LCAI | -39.74 $\pm$ 15.32       | 3.669    | 0.162            |
| HS:LSAI vs. LS:FCAI | 3.640 $\pm$ 17.85        | 0.288    | >0.999           |
| HS:LSAI vs. LS:LSAI | -60.18 $\pm$ 15.57       | 5.465    | <b>0.004</b>     |
| LS:FSAI vs. LS:LCAI | -44.76 $\pm$ 12.37       | 5.115    | <b>0.008</b>     |
| LS:FSAI vs. LS:FCAI | -1.380 $\pm$ 15.40       | 0.127    | >0.999           |
| LS:FSAI vs. LS:LSAI | -65.20 $\pm$ 12.69       | 7.265    | <b>&lt;0.001</b> |
| LS:LCAI vs. LS:FCAI | 43.38 $\pm$ 15.08        | 4.067    | 0.082            |
| LS:LCAI vs. LS:LSAI | -20.44 $\pm$ 12.30       | 2.350    | 0.712            |
| LS:FCAI vs. LS:LSAI | -63.82 $\pm$ 15.34       | 5.882    | <b>0.001</b>     |

**Table S16. Statistical comparisons of the effect of receptor stoichiometry and genotype on response to ACh (logEC<sub>50</sub>) from Human/*Epipedobates* combinations.** Human (*H*) wild-type  $\alpha 4\beta 2$  nAChRs [ $\alpha 4(\mathbf{D})$  and  $\beta 2(\mathbf{FSAI})$  genotypes], *Epipedobates* (*E*) wild-type  $\alpha 4\beta 2$  nAChRs [ $\alpha 4(\mathbf{N})$  and  $\beta 2(\mathbf{LCAI})$  genotypes], and combinations incorporating the mirror AA replacement patterns in  $\alpha 4$  (**D** and **N**), as well as the *Epipedobates*  $\beta 2(\mathbf{FCAI})$  genotype. For biphasic curves, only the low sensitivity EC<sub>50</sub> was included (see statistic section).  $\alpha 4:\beta 2$  cRNA ratio 7:1.

**A. One-way ANOVA**

| ANOVA table                 | SS    | DF  | MS     | F (DFn, DFd)       | P value |
|-----------------------------|-------|-----|--------|--------------------|---------|
| Treatment (between columns) | 480.4 | 6   | 80.06  | F (6, 283) = 93.21 | <0.001  |
| Residual (within columns)   | 243.1 | 283 | 0.8589 |                    |         |
| Total                       | 723.4 | 289 |        |                    |         |

**B. Tukey's multiple comparisons test**

| Receptor Comparison                                                                                                                     | Mean Difference<br>± SE | q     | Adjusted<br>P Value |
|-----------------------------------------------------------------------------------------------------------------------------------------|-------------------------|-------|---------------------|
| <i>E</i> $\alpha 4(\mathbf{N})$ <i>E</i> $\beta 2(\mathbf{LCAI})$ vs. <i>E</i> $\alpha 4(\mathbf{D})$ <i>E</i> $\beta 2(\mathbf{LCAI})$ | 0.022 ± 0.230           | 0.136 | >0.999              |
| <i>E</i> $\alpha 4(\mathbf{N})$ <i>E</i> $\beta 2(\mathbf{LCAI})$ vs. <i>E</i> $\alpha 4(\mathbf{N})$ <i>H</i> $\beta 2(\mathbf{FSAI})$ | 0.171 ± 0.222           | 1.085 | 0.988               |
| <i>E</i> $\alpha 4(\mathbf{N})$ <i>E</i> $\beta 2(\mathbf{LCAI})$ vs. <i>H</i> $\alpha 4(\mathbf{D})$ <i>H</i> $\beta 2(\mathbf{FSAI})$ | -2.602 ± 0.248          | 14.86 | <0.001              |
| <i>E</i> $\alpha 4(\mathbf{N})$ <i>E</i> $\beta 2(\mathbf{LCAI})$ vs. <i>H</i> $\alpha 4(\mathbf{N})$ <i>H</i> $\beta 2(\mathbf{FSAI})$ | -2.938 ± 0.212          | 19.64 | <0.001              |
| <i>E</i> $\alpha 4(\mathbf{N})$ <i>E</i> $\beta 2(\mathbf{LCAI})$ vs. <i>H</i> $\alpha 4(\mathbf{D})$ <i>E</i> $\beta 2(\mathbf{LCAI})$ | -1.763 ± 0.218          | 11.44 | <0.001              |
| <i>E</i> $\alpha 4(\mathbf{N})$ <i>E</i> $\beta 2(\mathbf{LCAI})$ vs. <i>H</i> $\alpha 4(\mathbf{D})$ <i>E</i> $\beta 2(\mathbf{FCAI})$ | -2.477 ± 0.232          | 15.09 | <0.001              |
| <i>E</i> $\alpha 4(\mathbf{D})$ <i>E</i> $\beta 2(\mathbf{LCAI})$ vs. <i>E</i> $\alpha 4(\mathbf{N})$ <i>H</i> $\beta 2(\mathbf{FSAI})$ | 0.148 ± 0.202           | 1.040 | 0.990               |
| <i>E</i> $\alpha 4(\mathbf{D})$ <i>E</i> $\beta 2(\mathbf{LCAI})$ vs. <i>H</i> $\alpha 4(\mathbf{D})$ <i>H</i> $\beta 2(\mathbf{FSAI})$ | -2.624 ± 0.230          | 16.17 | <0.001              |
| <i>E</i> $\alpha 4(\mathbf{D})$ <i>E</i> $\beta 2(\mathbf{LCAI})$ vs. <i>H</i> $\alpha 4(\mathbf{N})$ <i>H</i> $\beta 2(\mathbf{FSAI})$ | -2.960 ± 0.190          | 22.03 | <0.001              |
| <i>E</i> $\alpha 4(\mathbf{D})$ <i>E</i> $\beta 2(\mathbf{LCAI})$ vs. <i>H</i> $\alpha 4(\mathbf{D})$ <i>E</i> $\beta 2(\mathbf{LCAI})$ | -1.785 ± 0.197          | 12.81 | <0.001              |
| <i>E</i> $\alpha 4(\mathbf{D})$ <i>E</i> $\beta 2(\mathbf{LCAI})$ vs. <i>H</i> $\alpha 4(\mathbf{D})$ <i>E</i> $\beta 2(\mathbf{FCAI})$ | -2.499 ± 0.213          | 16.62 | <0.001              |
| <i>E</i> $\alpha 4(\mathbf{N})$ <i>H</i> $\beta 2(\mathbf{FSAI})$ vs. <i>H</i> $\alpha 4(\mathbf{D})$ <i>H</i> $\beta 2(\mathbf{FSAI})$ | -2.773 ± 0.222          | 17.65 | <0.001              |
| <i>E</i> $\alpha 4(\mathbf{N})$ <i>H</i> $\beta 2(\mathbf{FSAI})$ vs. <i>H</i> $\alpha 4(\mathbf{N})$ <i>H</i> $\beta 2(\mathbf{FSAI})$ | -3.109 ± 0.181          | 24.29 | <0.001              |
| <i>E</i> $\alpha 4(\mathbf{N})$ <i>H</i> $\beta 2(\mathbf{FSAI})$ vs. <i>H</i> $\alpha 4(\mathbf{D})$ <i>E</i> $\beta 2(\mathbf{LCAI})$ | -1.934 ± 0.188          | 14.51 | <0.001              |
| <i>E</i> $\alpha 4(\mathbf{N})$ <i>H</i> $\beta 2(\mathbf{FSAI})$ vs. <i>H</i> $\alpha 4(\mathbf{D})$ <i>E</i> $\beta 2(\mathbf{FCAI})$ | -2.648 ± 0.205          | 18.29 | <0.001              |
| <i>H</i> $\alpha 4(\mathbf{D})$ <i>H</i> $\beta 2(\mathbf{FSAI})$ vs. <i>H</i> $\alpha 4(\mathbf{N})$ <i>H</i> $\beta 2(\mathbf{FSAI})$ | -0.336 ± 0.212          | 2.246 | 0.690               |
| <i>H</i> $\alpha 4(\mathbf{D})$ <i>H</i> $\beta 2(\mathbf{FSAI})$ vs. <i>H</i> $\alpha 4(\mathbf{D})$ <i>E</i> $\beta 2(\mathbf{LCAI})$ | 0.839 ± 0.218           | 5.443 | <b>0.003</b>        |
| <i>H</i> $\alpha 4(\mathbf{D})$ <i>H</i> $\beta 2(\mathbf{FSAI})$ vs. <i>H</i> $\alpha 4(\mathbf{D})$ <i>E</i> $\beta 2(\mathbf{FCAI})$ | 0.125 ± 0.232           | 0.762 | 0.998               |
| <i>H</i> $\alpha 4(\mathbf{N})$ <i>H</i> $\beta 2(\mathbf{FSAI})$ vs. <i>H</i> $\alpha 4(\mathbf{D})$ <i>E</i> $\beta 2(\mathbf{LCAI})$ | 1.175 ± 0.176           | 9.450 | <0.001              |
| <i>H</i> $\alpha 4(\mathbf{N})$ <i>H</i> $\beta 2(\mathbf{FSAI})$ vs. <i>H</i> $\alpha 4(\mathbf{D})$ <i>E</i> $\beta 2(\mathbf{FCAI})$ | 0.461 ± 0.193           | 3.376 | 0.208               |
| <i>H</i> $\alpha 4(\mathbf{D})$ <i>E</i> $\beta 2(\mathbf{LCAI})$ vs. <i>H</i> $\alpha 4(\mathbf{D})$ <i>E</i> $\beta 2(\mathbf{FCAI})$ | -0.714 ± 0.200          | 5.045 | <b>0.008</b>        |

**Additional Data table S1 (separate file)**

Chrb2\_alignment.nex: Nexus alignment of chrb2 nucleotide sequences

Chrna4\_alignment.nex: Nexus alignment of chrna4 nucleotide sequences
